# Supplementary material for: Nornicotine-organocatalyzed aqueous reduction of α,β-unsaturated aldehydes
Source: Royal Society of Chemistry journal article supplement (doi:10.1039/b713273e), 2007-01-01

## Nornicotine-Organocatalyzed Aqueous Reduction of $\alpha,\beta$ -Unsaturated Aldehydes

### Supporting Information

Andrew P. Brogan, Tobin J. Dickerson\* and Kim D. Janda\*

Departments of Chemistry and Immunology, The Skaggs Institute for Chemical Biology, and  
Worm Institute for Research and Medicine (WIRM)

The Scripps Research Institute

10550 North Torrey Pines Road, BCC 582

La Jolla, CA 92037 USA

Tel: +1 858 784 2516

Fax: +1 858 784 2595

Email: tobin@scripps.edu or kdjanda@scripps.edu

### Table of Contents

|                                                                                                |        |
|------------------------------------------------------------------------------------------------|--------|
| Synthetic procedures .....                                                                     | S2     |
| <sup>1</sup> H & <sup>13</sup> C NMR spectra of all non-commercially available compounds ..... | S3-S30 |

## General Procedures

All reagents were purchased from Sigma-Aldrich, Fisher, Alfa Aesar, TCI, or Toronto Research Chemicals and used as received.  $^1\text{H}$  NMR and  $^{13}\text{C}$  NMR spectra were recorded on a Varian INOVA-400 spectrometer at 400 MHz and 100 MHz respectively. Electrospray ionization (ESI) mass spectrometry experiments were performed on an Agilent ESI-TOF mass spectrometer. Preparative HPLC was performed on a Shimadzu preparative HPLC (model LC-8A) equipped with a column oven and UV detector (model SPD-10A) using preparative Vydac RP-C<sub>18</sub> columns. Yields less than 2 mg were determined by  $^1\text{H}$  NMR using 2,5-dimethylfuran as an internal standard.<sup>1</sup> With the exception of 2-methoxy-4-(3-oxopropyl)phenyl ethanoate, all other compounds were either commercially available or have been previously described. All analytical data was consistent with literature values.

## General procedure for the nornicotine-catalyzed aqueous reduction of $\alpha,\beta$ -unsaturated aldehydes

To a reaction vessel containing cinnamaldehyde (10 mg), 1,4-dihydropyridine-3,5-dicarboxylic acid (**4**) (1.2 equiv.) and NaHCO<sub>3</sub> (2.4 equiv.) was added DMSO (0–1.2 mL) and phosphate buffer (200 mM, pH 7.0, 2.8–4 mL). Nornicotine (20–200 mol%) was added and the mixture was capped and placed on an orbital shaker (160 rpm) at 32 °C for 0.5–23 h. Brine (5 mL) was added and the reaction mixture was extracted with DCM (3 × 5 mL). The organic layer was concentrated and the reduced product was isolated by preparative-TLC (chloroform/acetone or hexanes/ethyl acetate).

2-Methoxy-4-(3-oxopropyl)phenyl ethanoate.  $^1\text{H}$  NMR (CDCl<sub>3</sub>)  $\delta$  2.30 (s, 3 H), 2.79 (m, 2H), 2.94 (m, 2H), 3.81 (s, 3 H), 6.76 (dd,  $J$  = 1.8, 8.0 Hz, 1 H), 6.80 (d,  $J$  = 1.8 Hz, 1 H), 6.94 (d,  $J$  = 8.0 Hz, 1 H), 6.94 (t,  $J$  = 1.2 Hz, 1 H);  $^{13}\text{C}$  NMR (CDCl<sub>3</sub>)  $\delta$  20.6, 27.9, 45.2, 55.8, 112.6, 120.3, 122.7, 138.1, 139.3, 150.9, 169.1, 201.2. HRMS (ESI-TOF):  $m/z$  calcd for C<sub>12</sub>H<sub>14</sub>O<sub>4</sub>Na, 245.0784 [M+Na]<sup>+</sup>, found: 25.0786.

For the reaction using (*E*)-2-methoxy-4-(3-oxoprop-1-enyl)phenyl ethanoate, 3.4 equiv. of NaHCO<sub>3</sub> was used and the reduced product was purified by preparative RP-HPLC after diluting the reaction mixture with DMSO (2 mL) and acetic acid (1 mL). Gradient RP-HPLC conditions: 15–45% B (solvent B = acetonitrile with 0.09% TFA, solvent A = water with 0.1% TFA) over 30 min starting a 10 min with a solvent flow rate of 10 mL min<sup>-1</sup>; UV detection at 214 and 254 nm; **3f** retention time: 23.7 min.

<sup>1</sup> Gerritz, S. W.; Seffler, A. M. *J. Comb. Chem* **2000**, 2, 39–41.

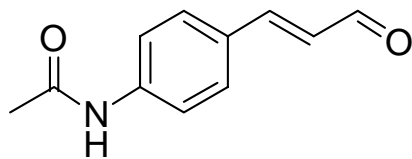

Supplementary Material (ESI) for Chemical Communications  
This journal is (c) The Royal Society of Chemistry 2007

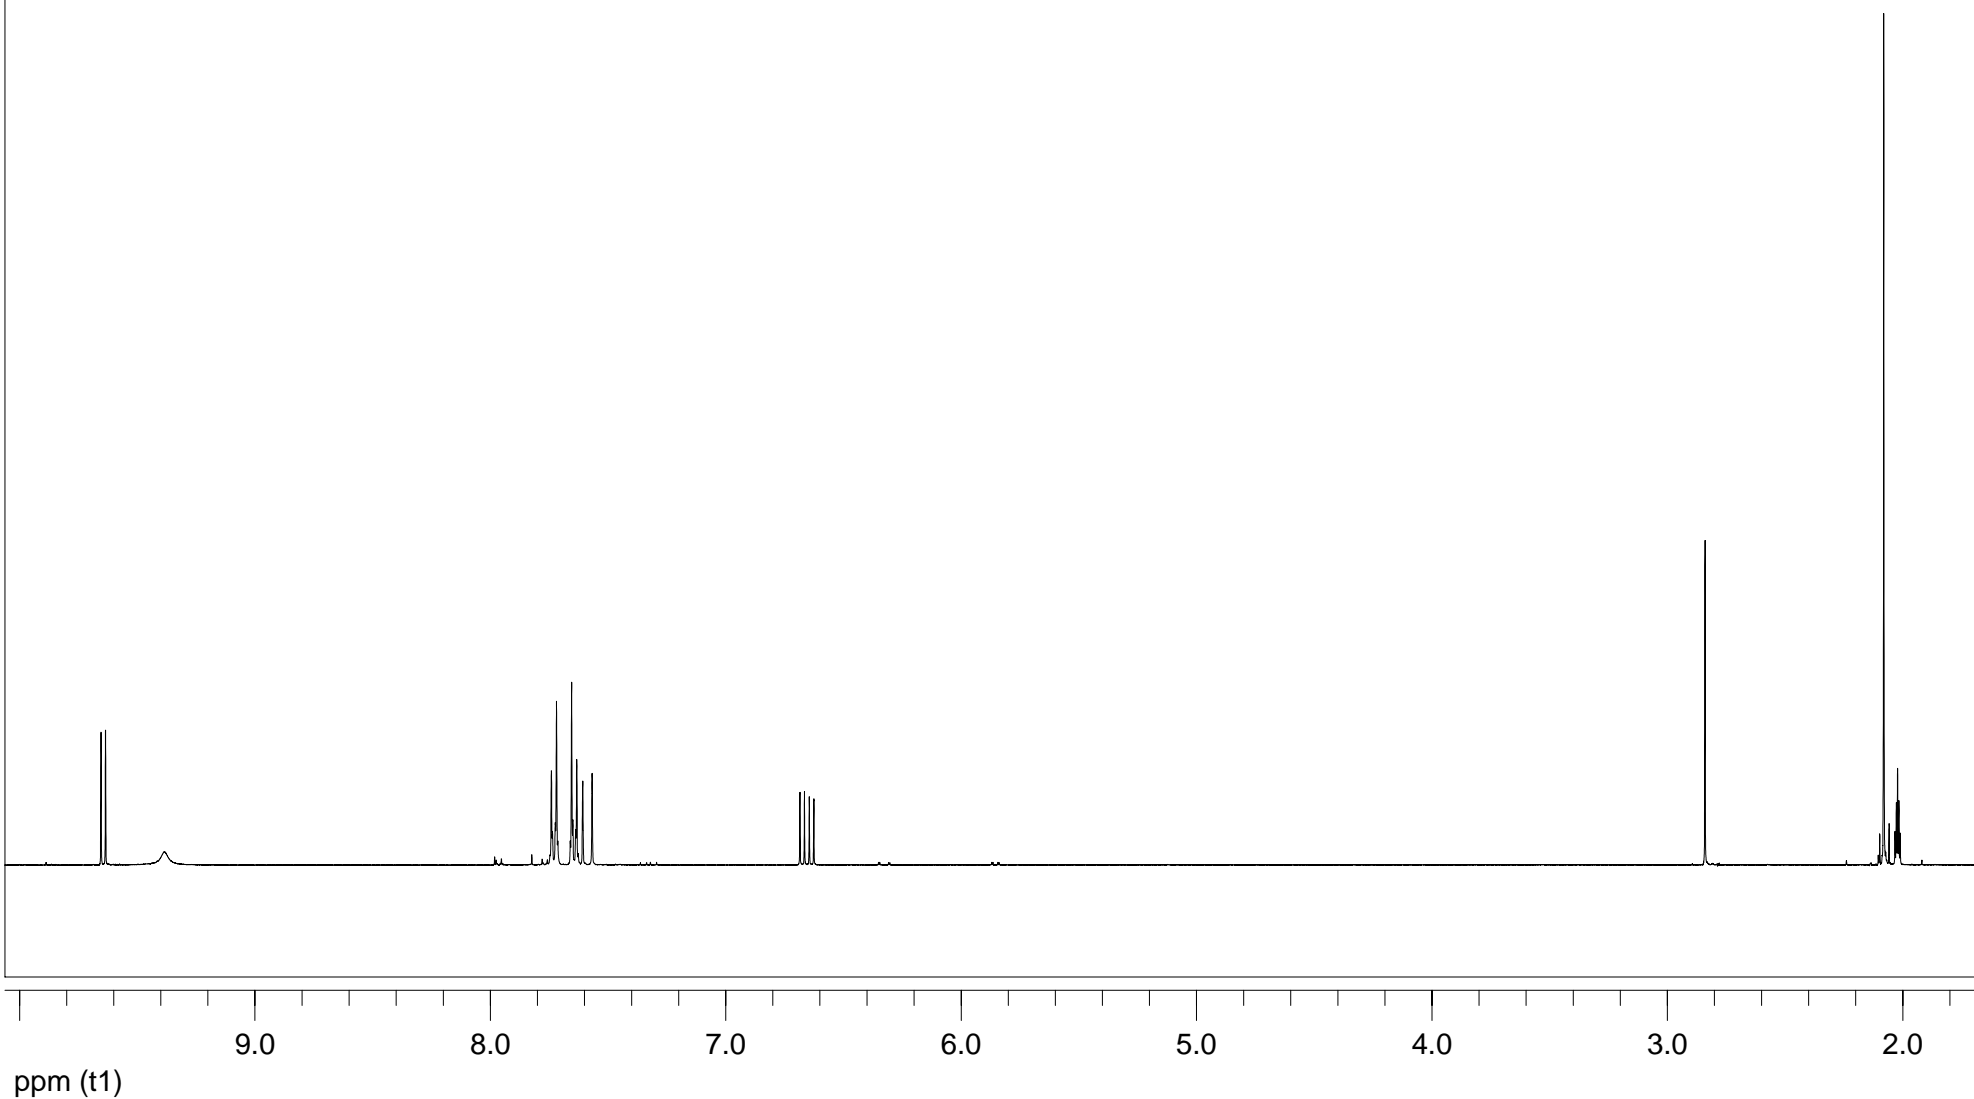

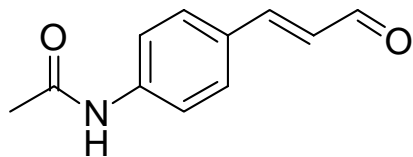

Supplementary Material (ESI) for Chemical Communications  
This journal is (c) The Royal Society of Chemistry 2007

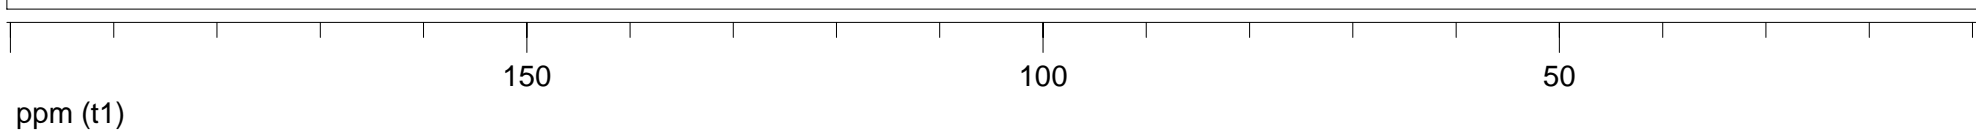



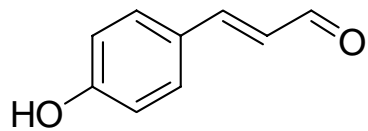

Supplementary Material (ESI) for Chemical Communications  
This journal is (c) The Royal Society of Chemistry 2007

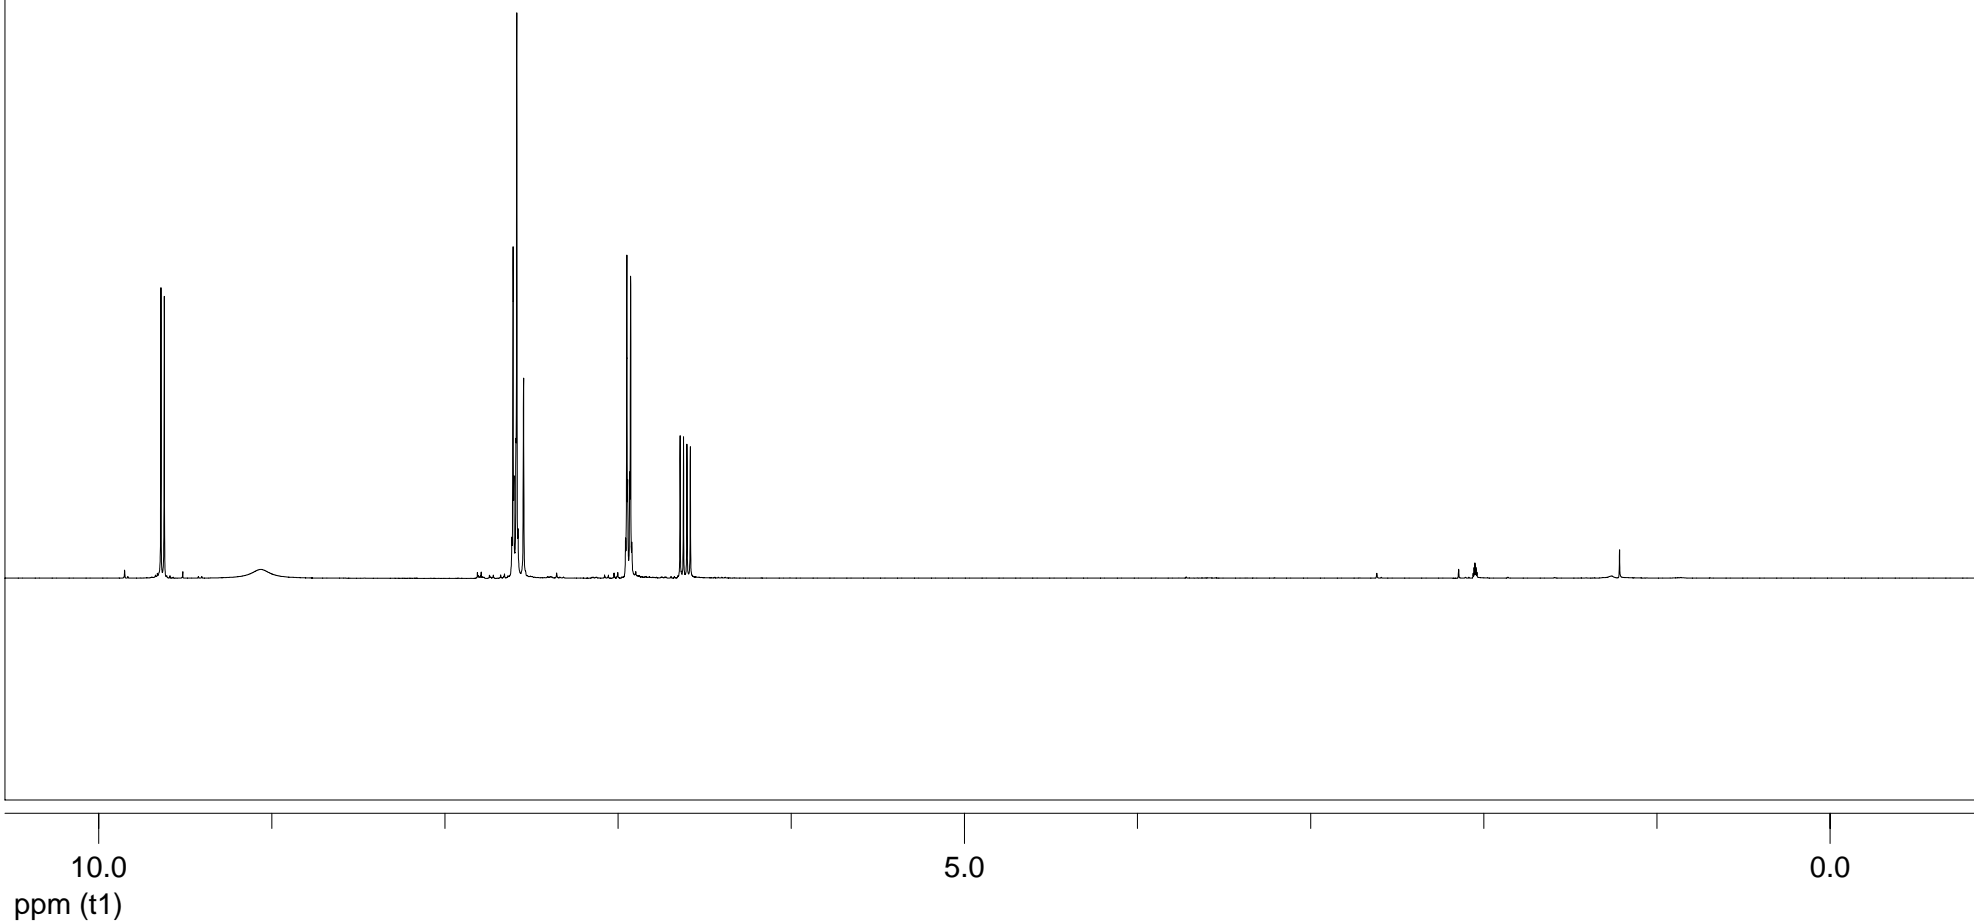

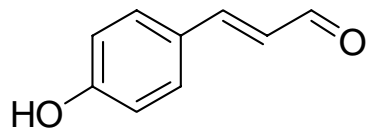

Supplementary Material (ESI) for Chemical Communications  
This journal is (c) The Royal Society of Chemistry 2007

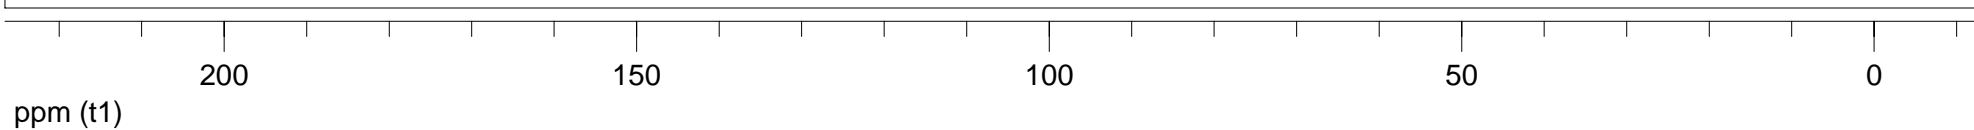

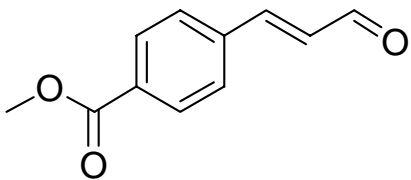

Supplementary Material (ESI) for Chemical Communications  
This journal is (c) The Royal Society of Chemistry 2007

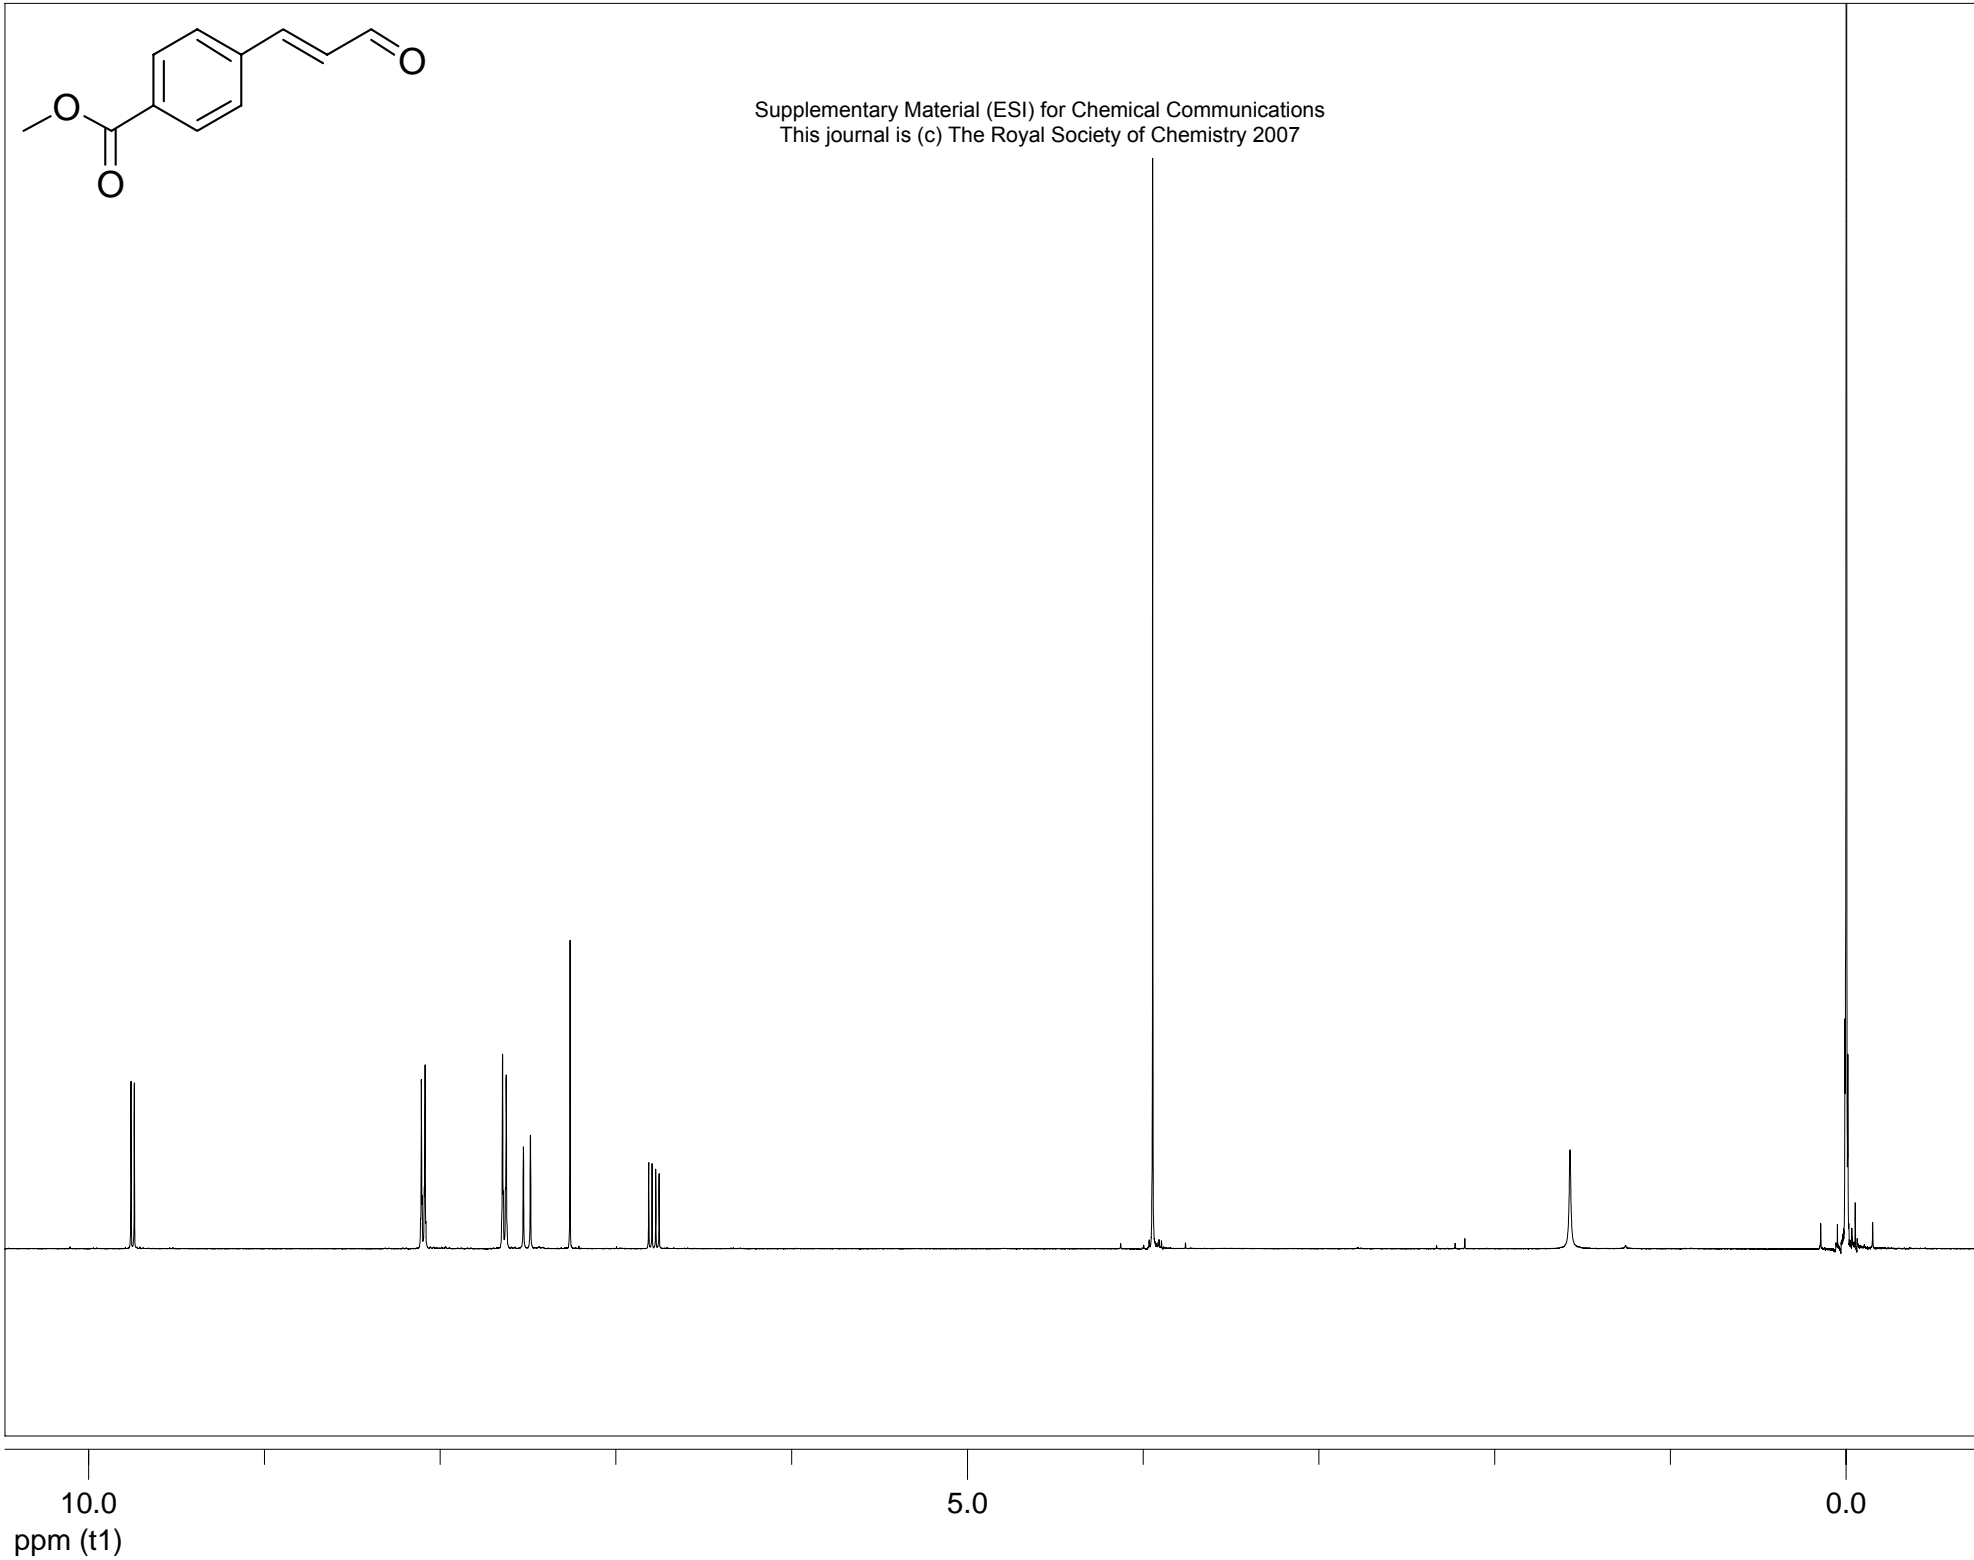

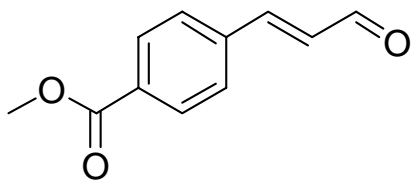

Supplementary Material (ESI) for Chemical Communications  
This journal is (c) The Royal Society of Chemistry 2007

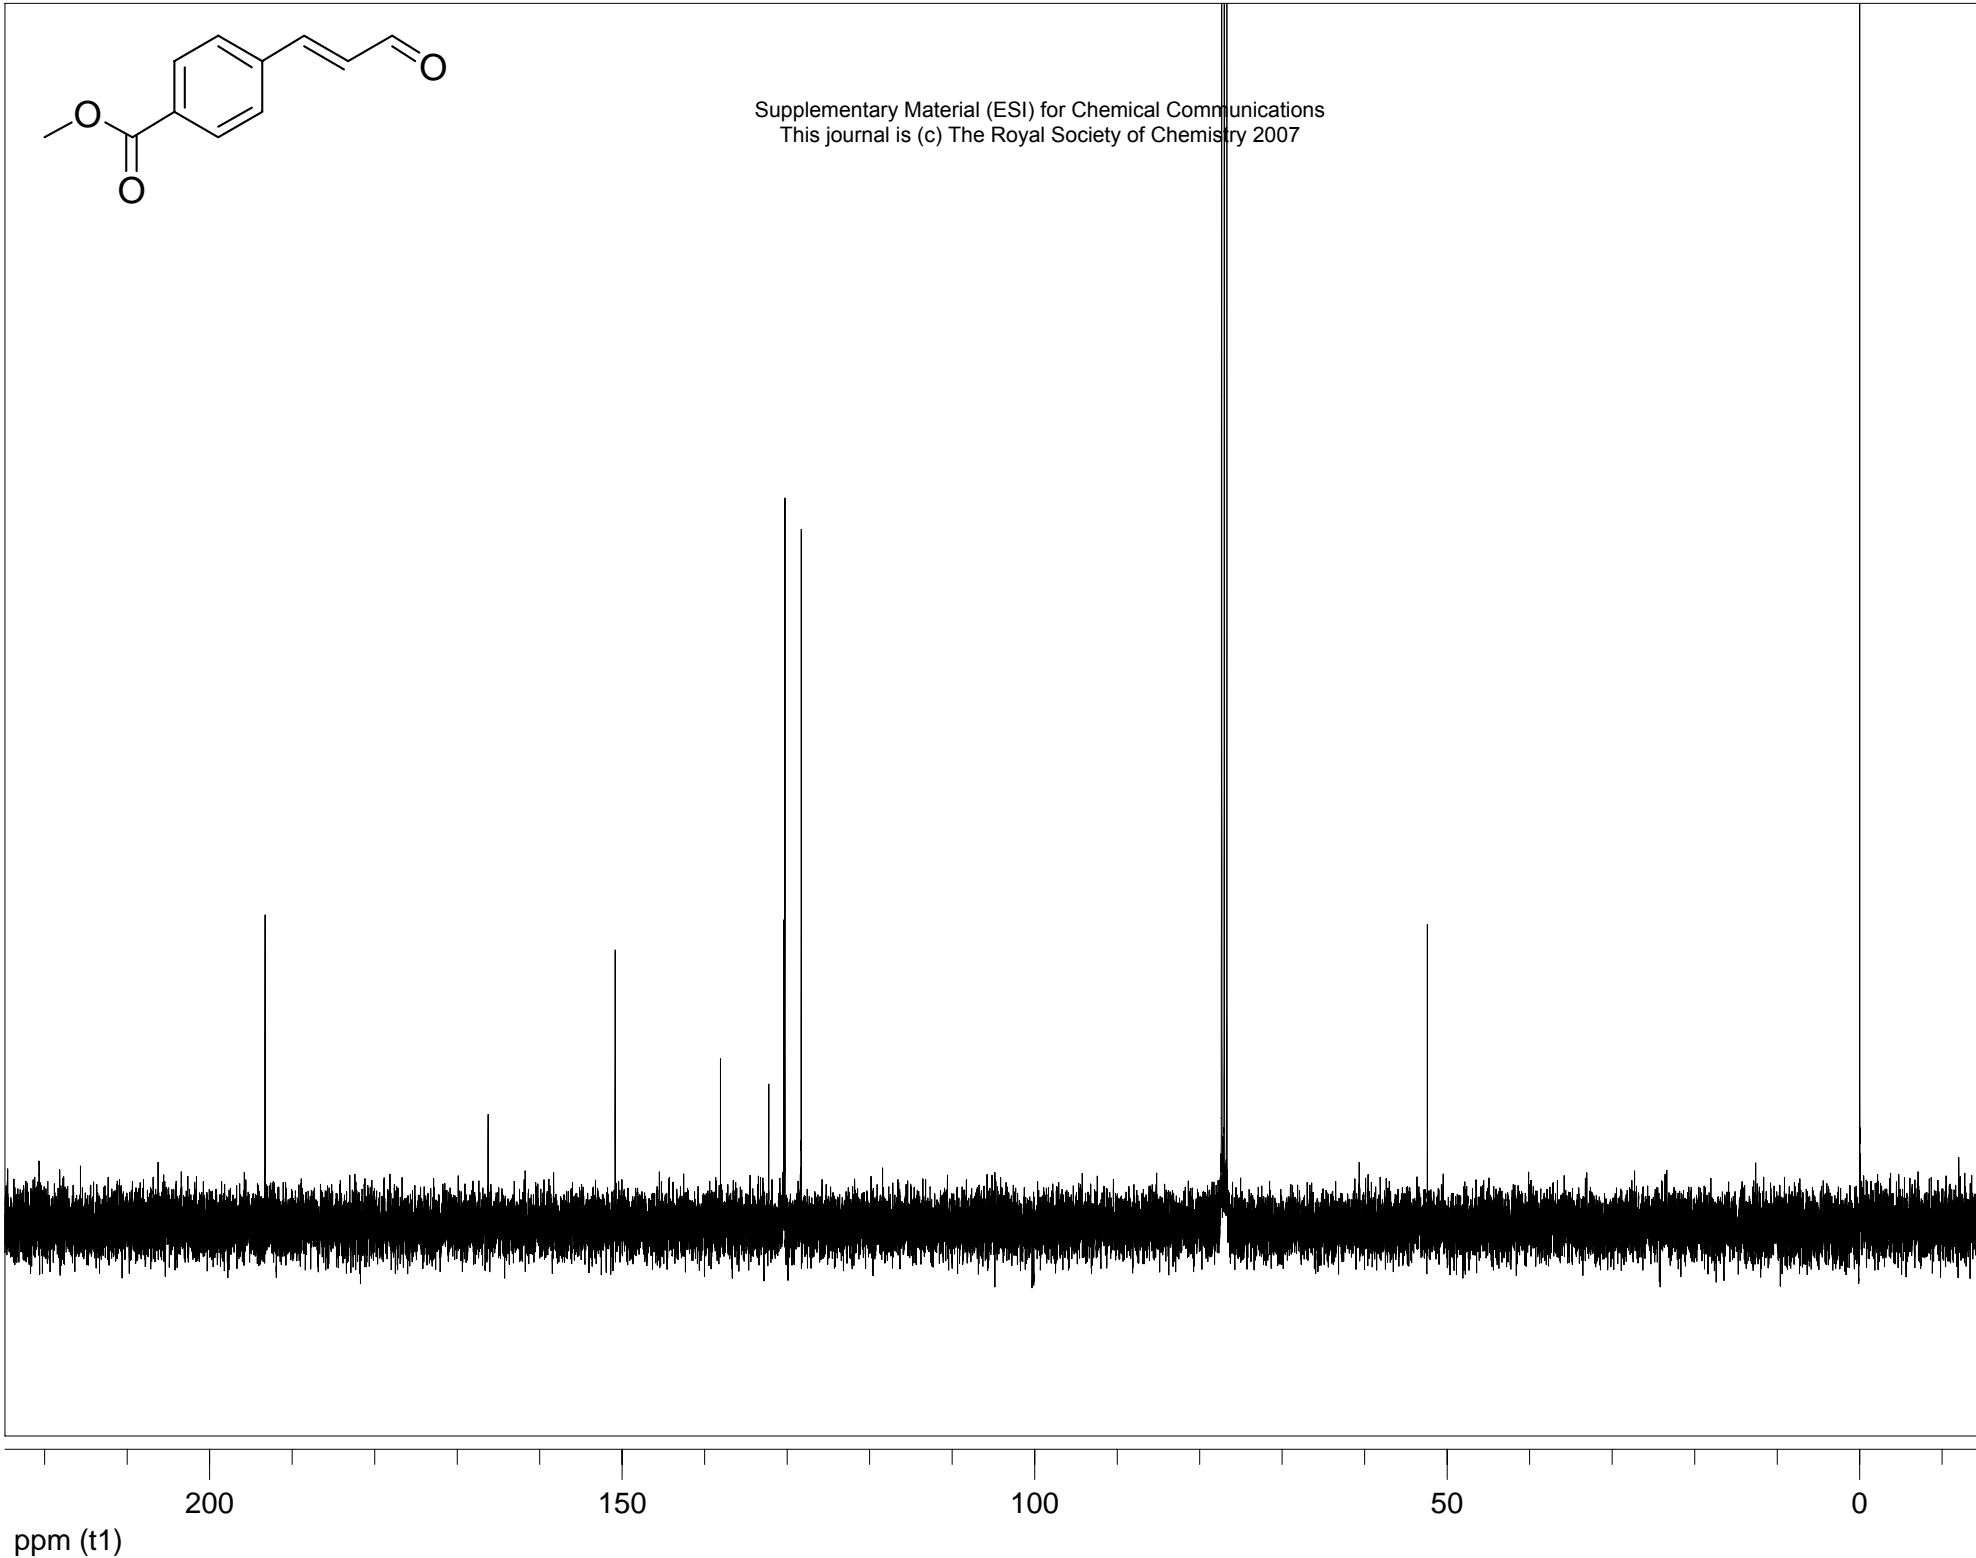

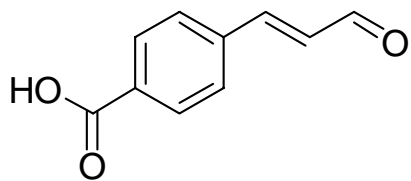

Supplementary Material (ESI) for Chemical Communications  
This journal is (c) The Royal Society of Chemistry 2007

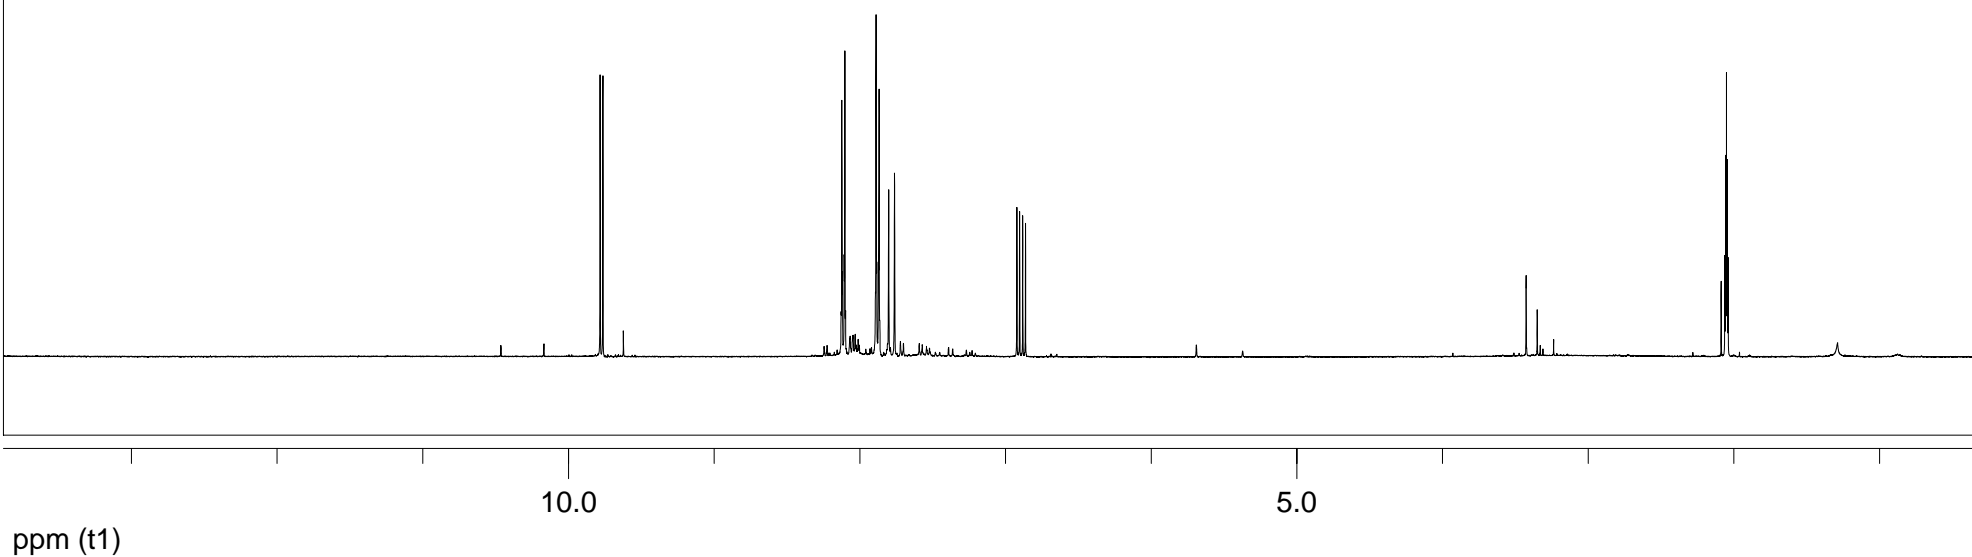

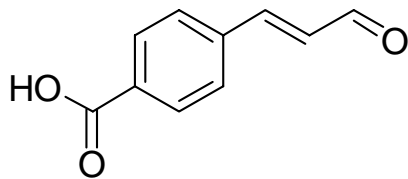

Supplementary Material (ESI) for Chemical Communications  
This journal is (c) The Royal Society of Chemistry 2007

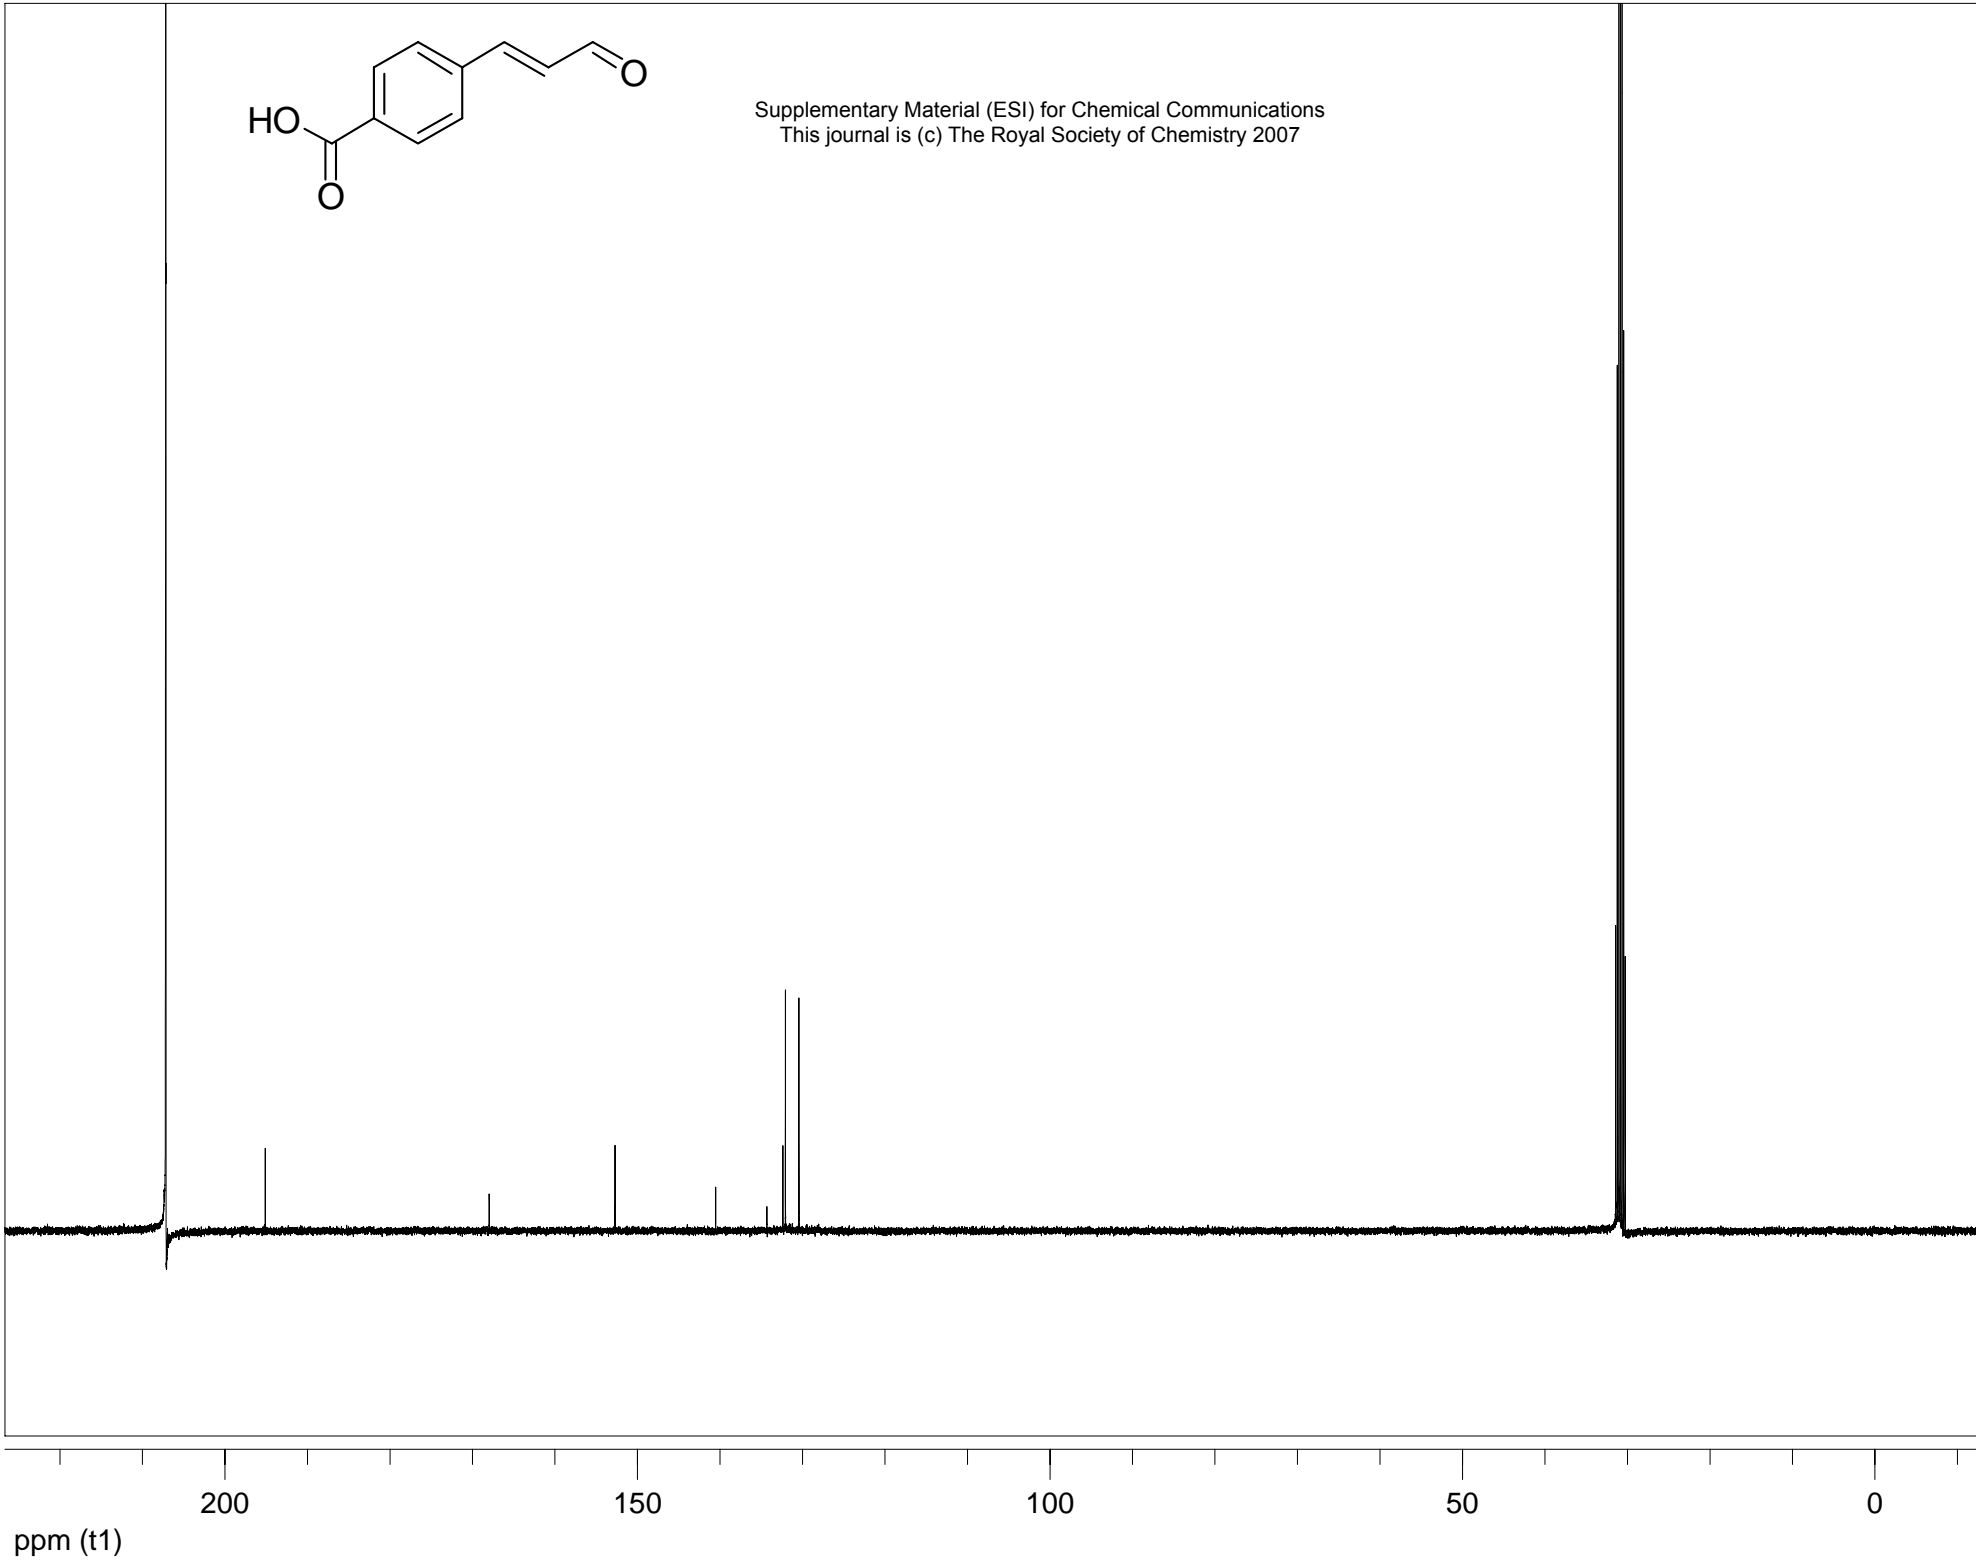

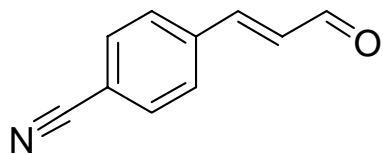

Supplementary Material (ESI) for Chemical Communications  
This journal is (c) The Royal Society of Chemistry 2007

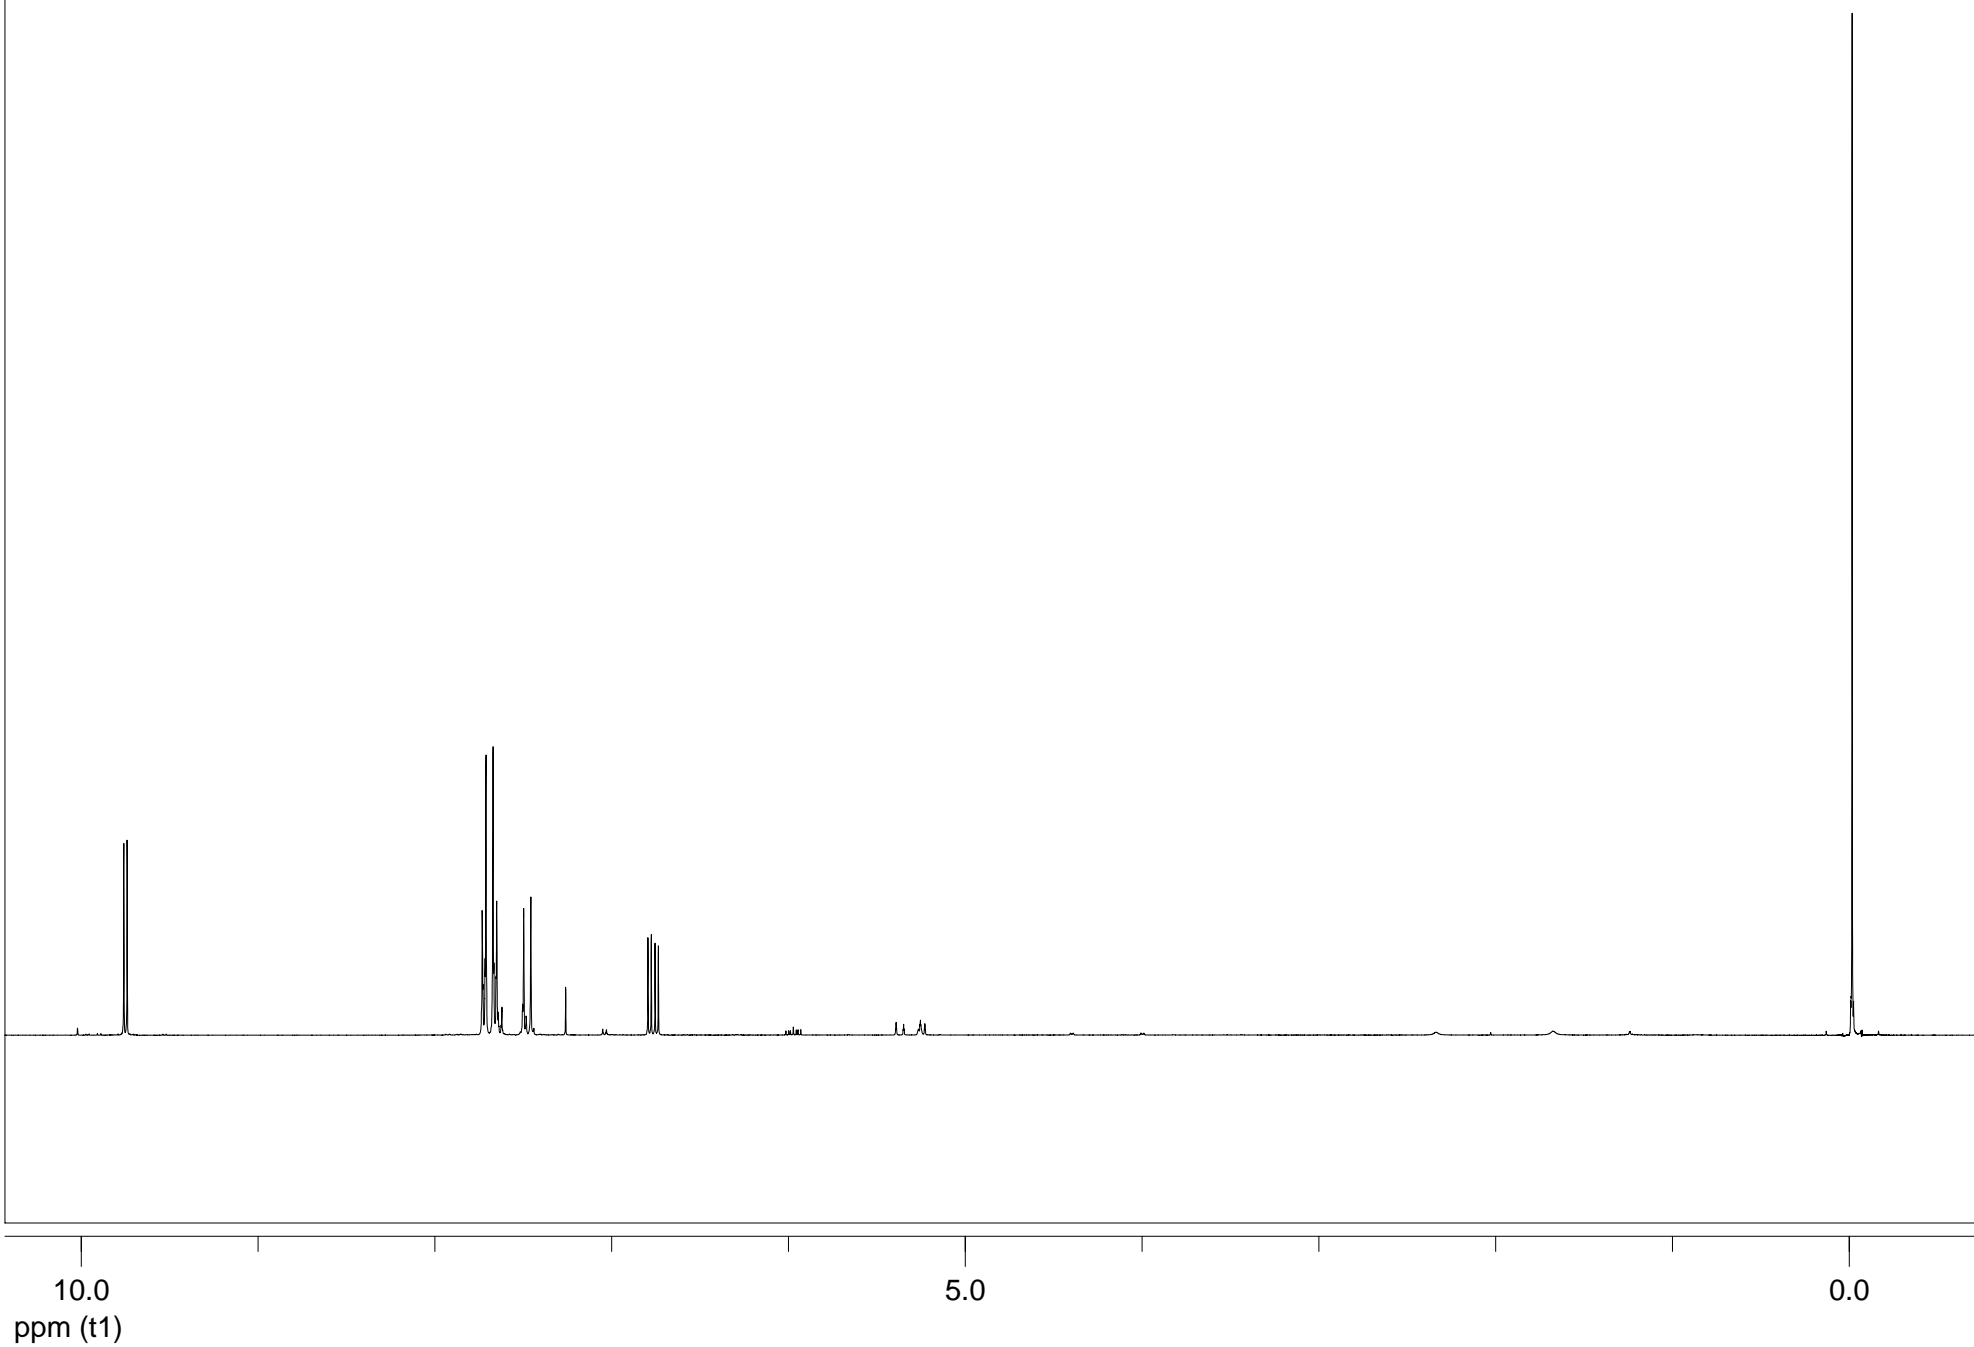

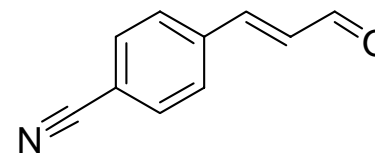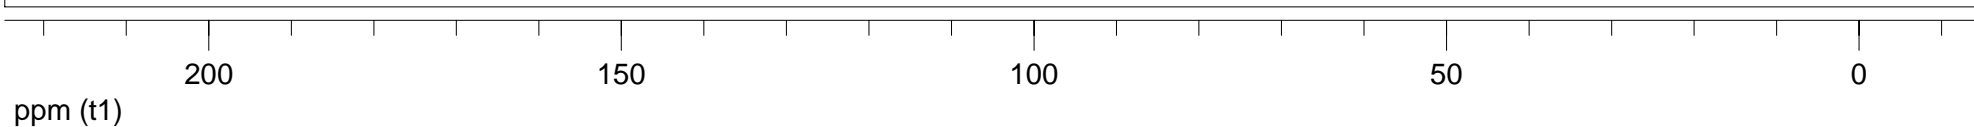



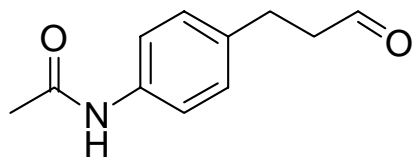

Supplementary Material (ESI) for Chemical Communications  
This journal is (c) The Royal Society of Chemistry 2007

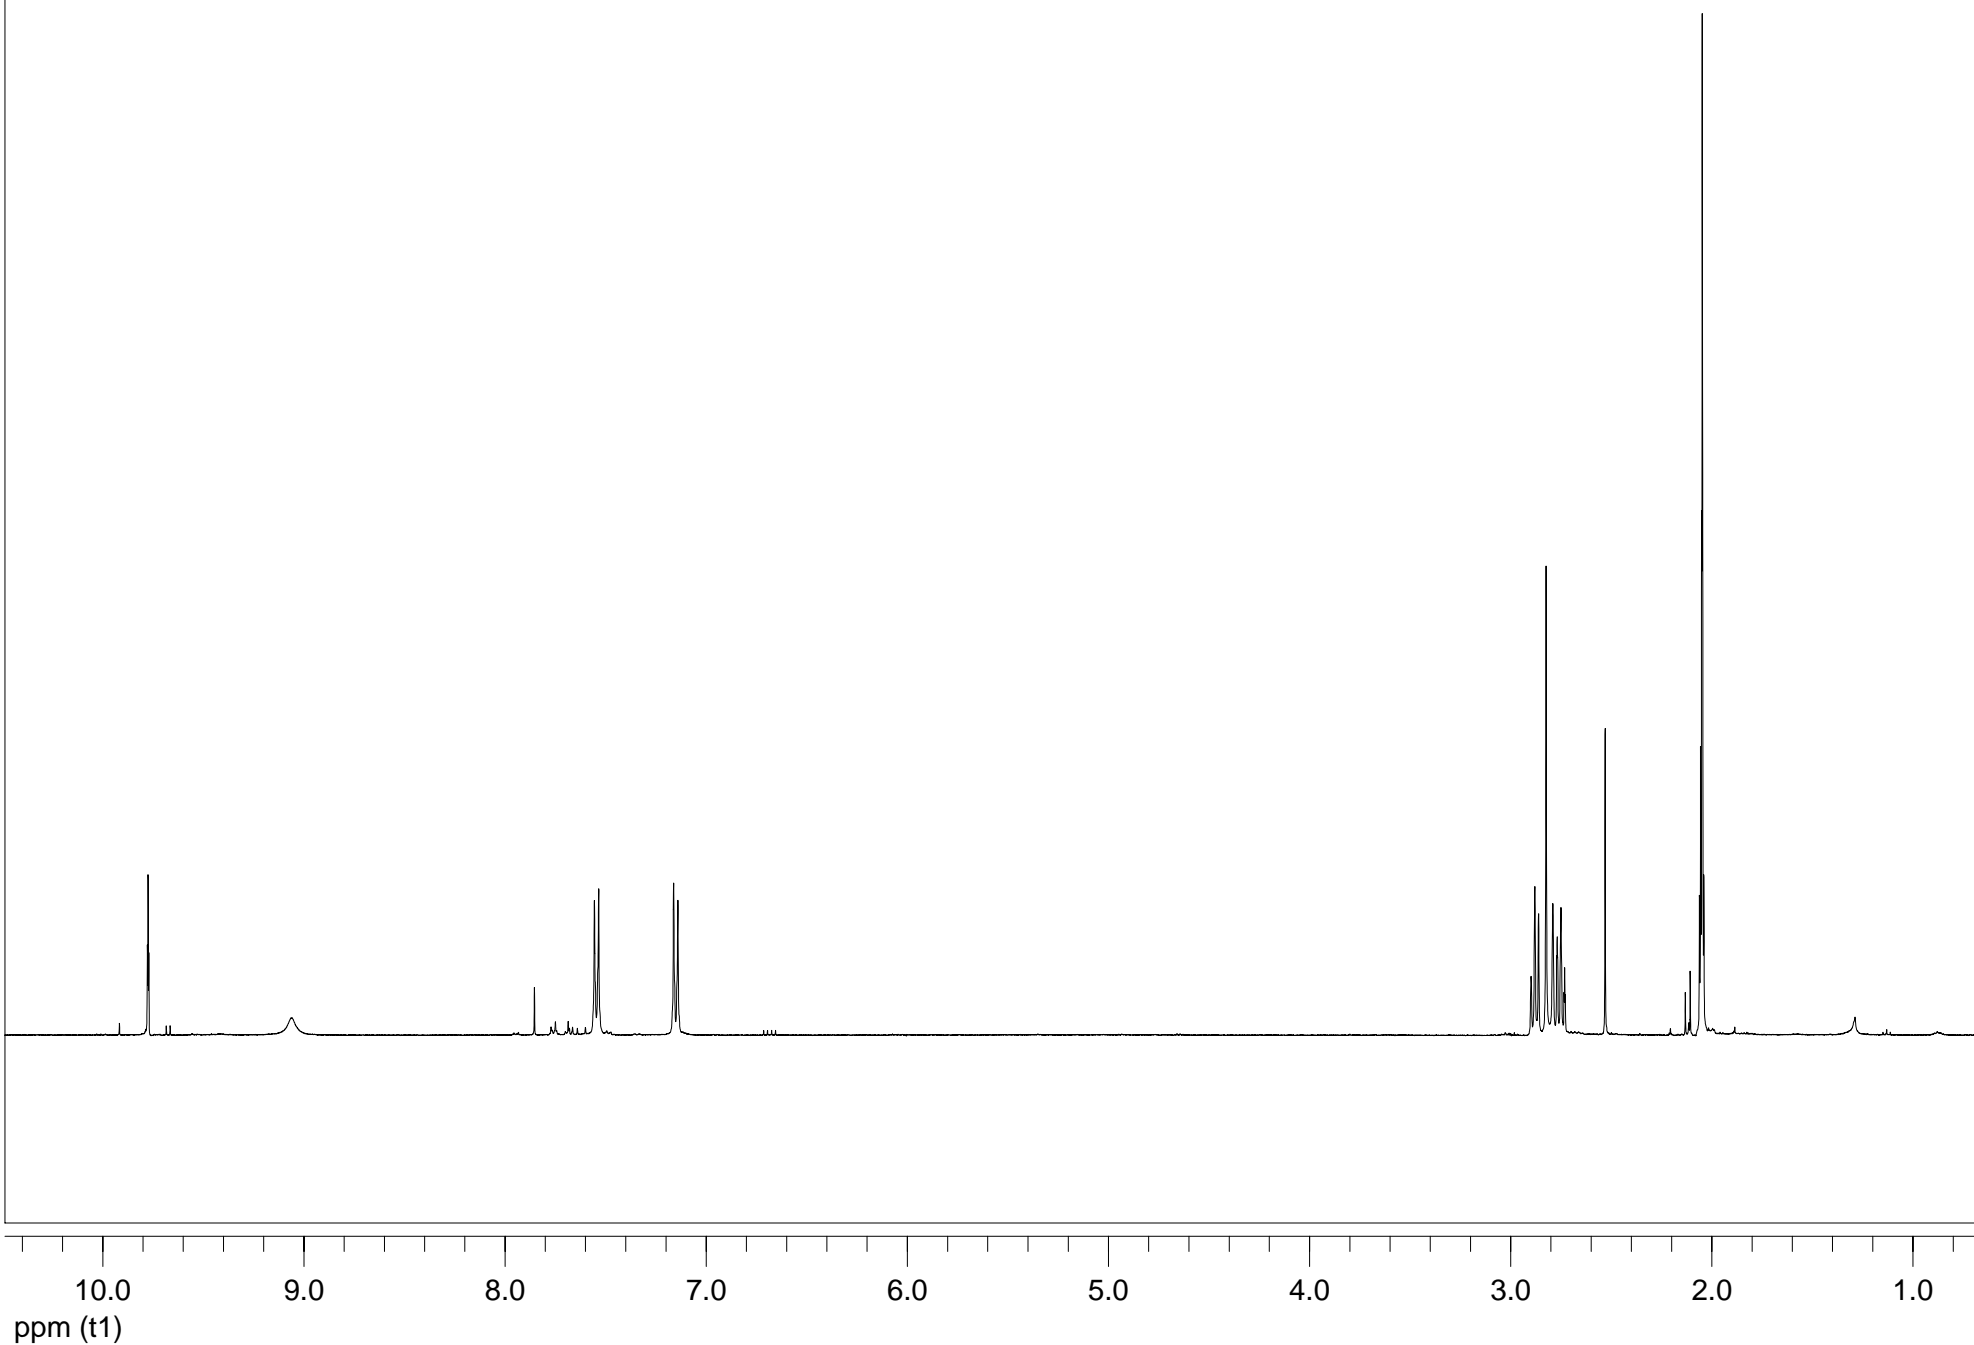

Material (ESI) for Chemical Communications  
The Royal Society of Chemistry 2007

CC(=O)Nc1ccc(cc1)CC=CC=O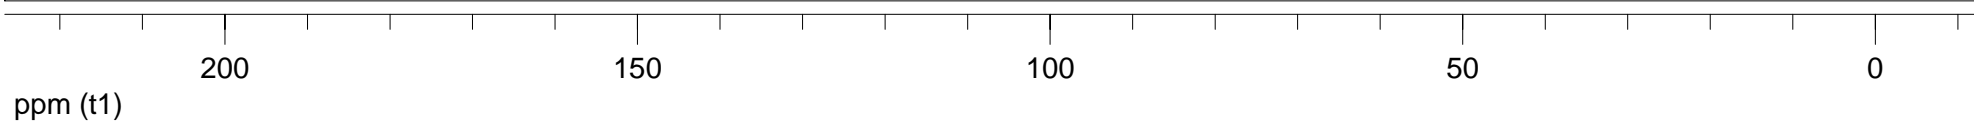

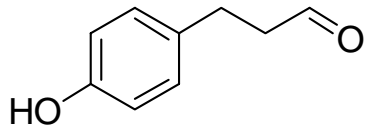

Supplementary Material (ESI) for Chemical Communications  
This journal is (c) The Royal Society of Chemistry 2007

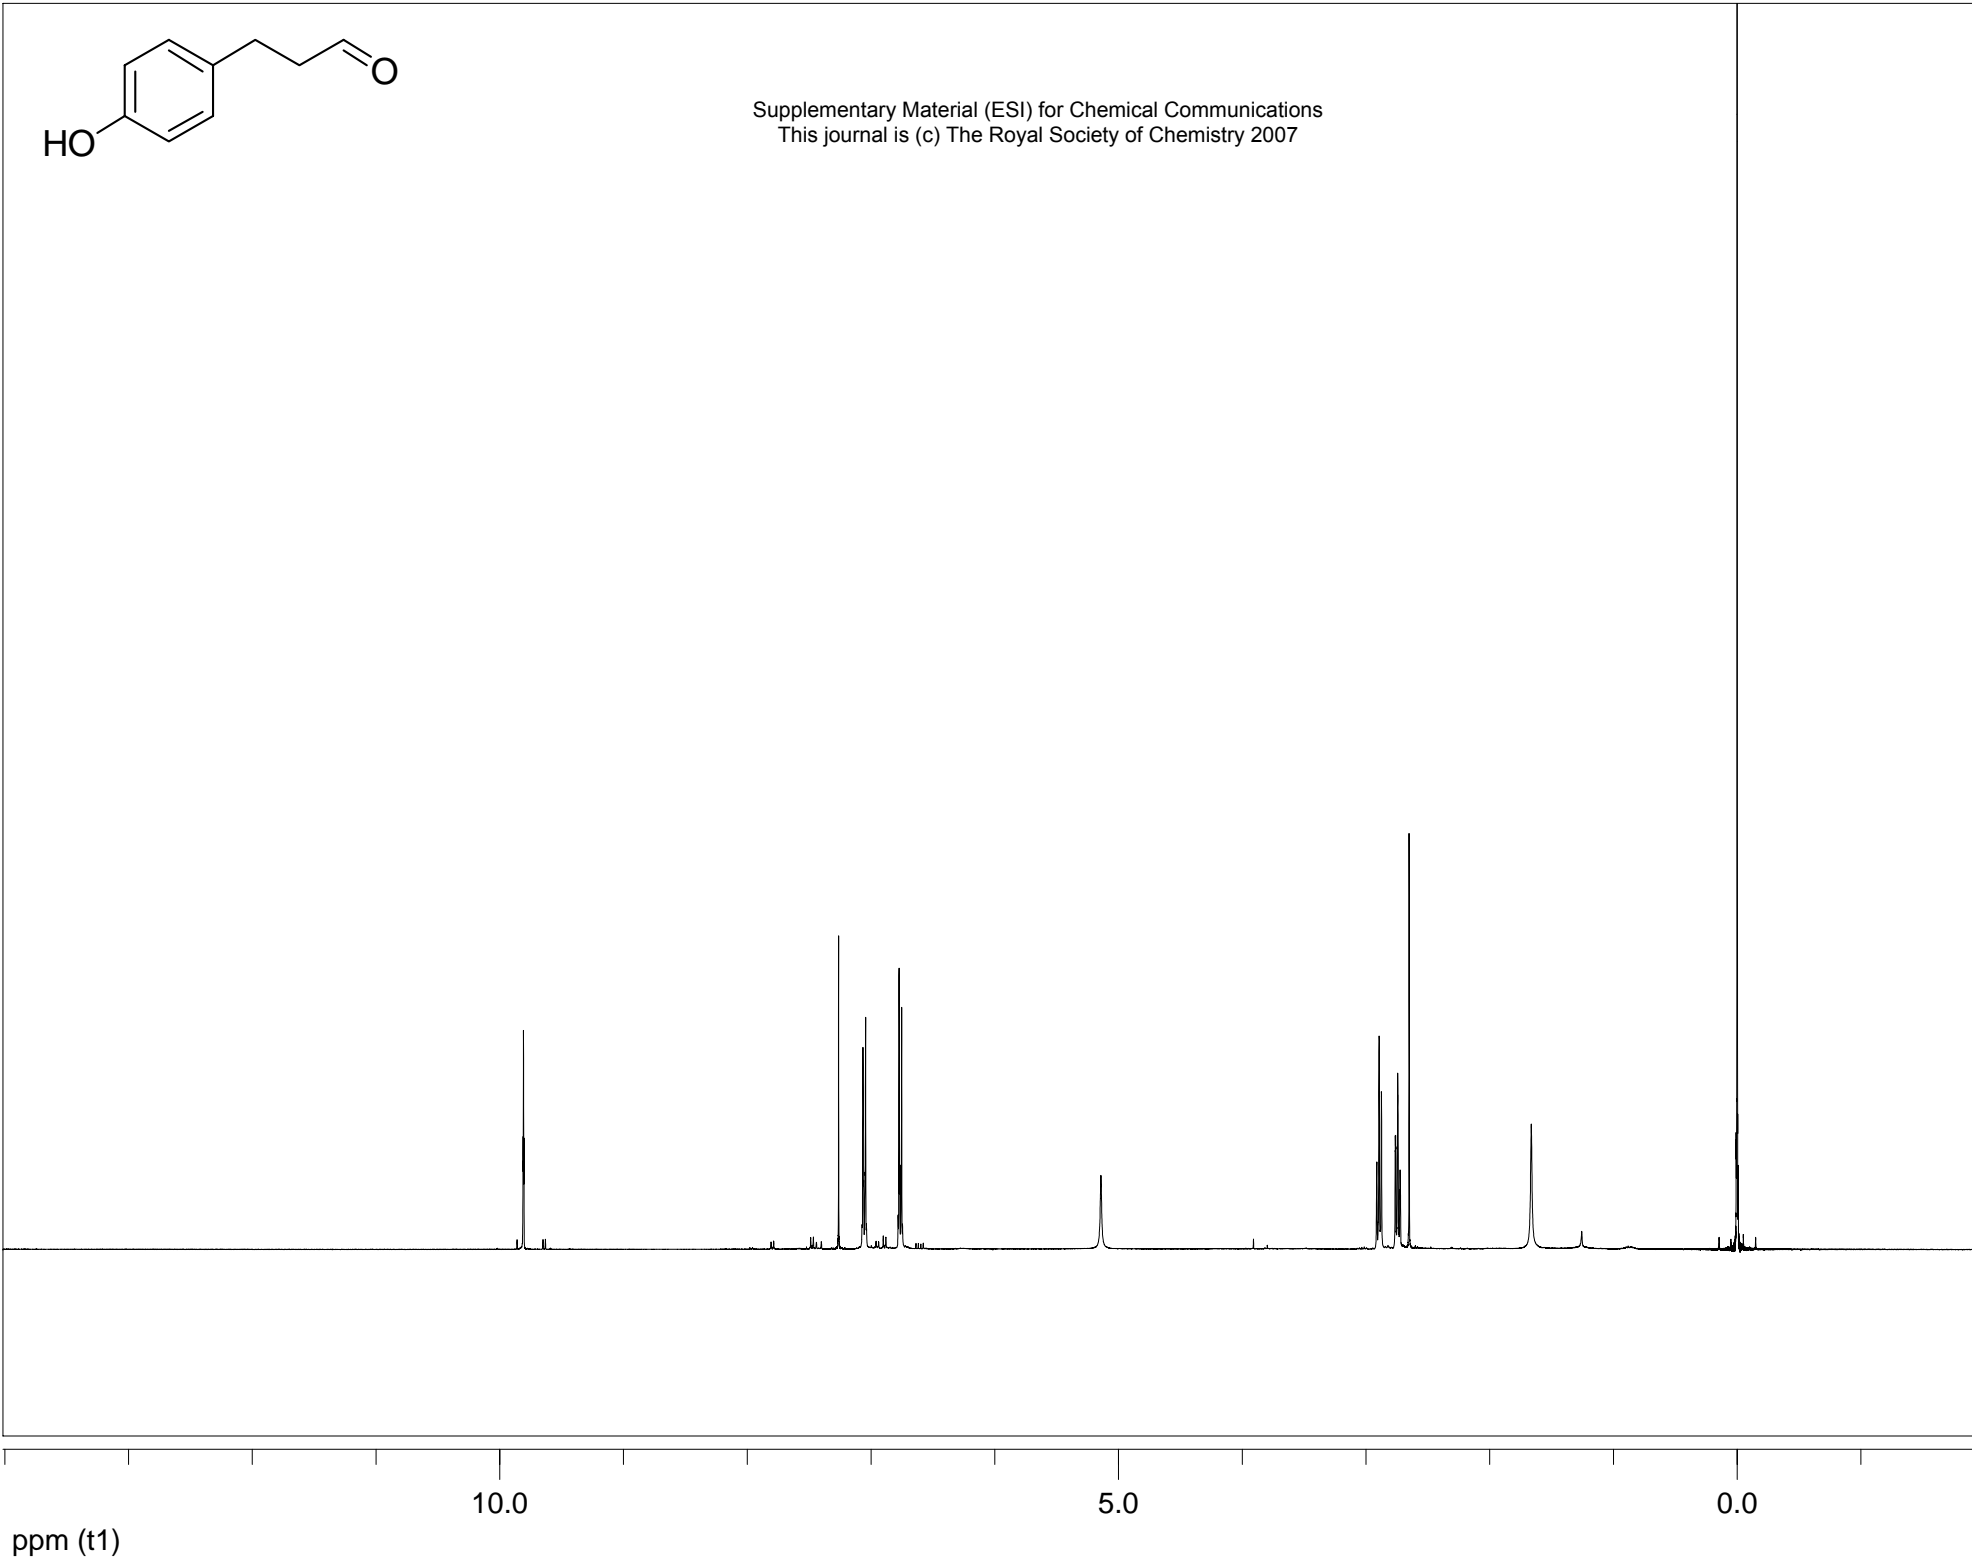

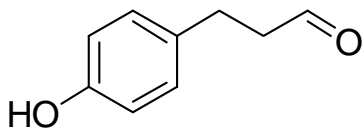

Supplementary Material (ESI) for Chemical Communications  
This journal is (c) The Royal Society of Chemistry 2007

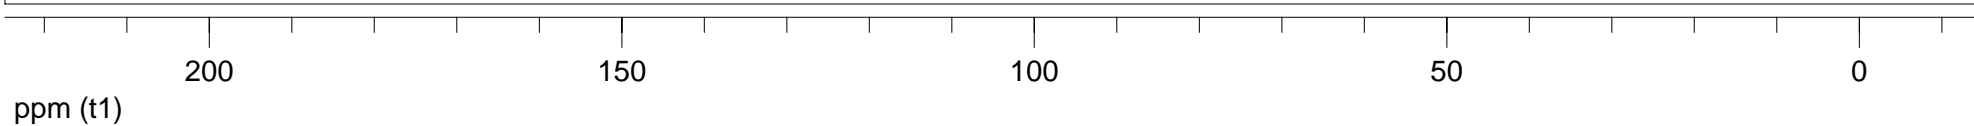

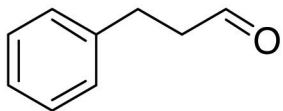

Supplementary Material (ESI) for Chemical Communications  
This journal is (c) The Royal Society of Chemistry 2007

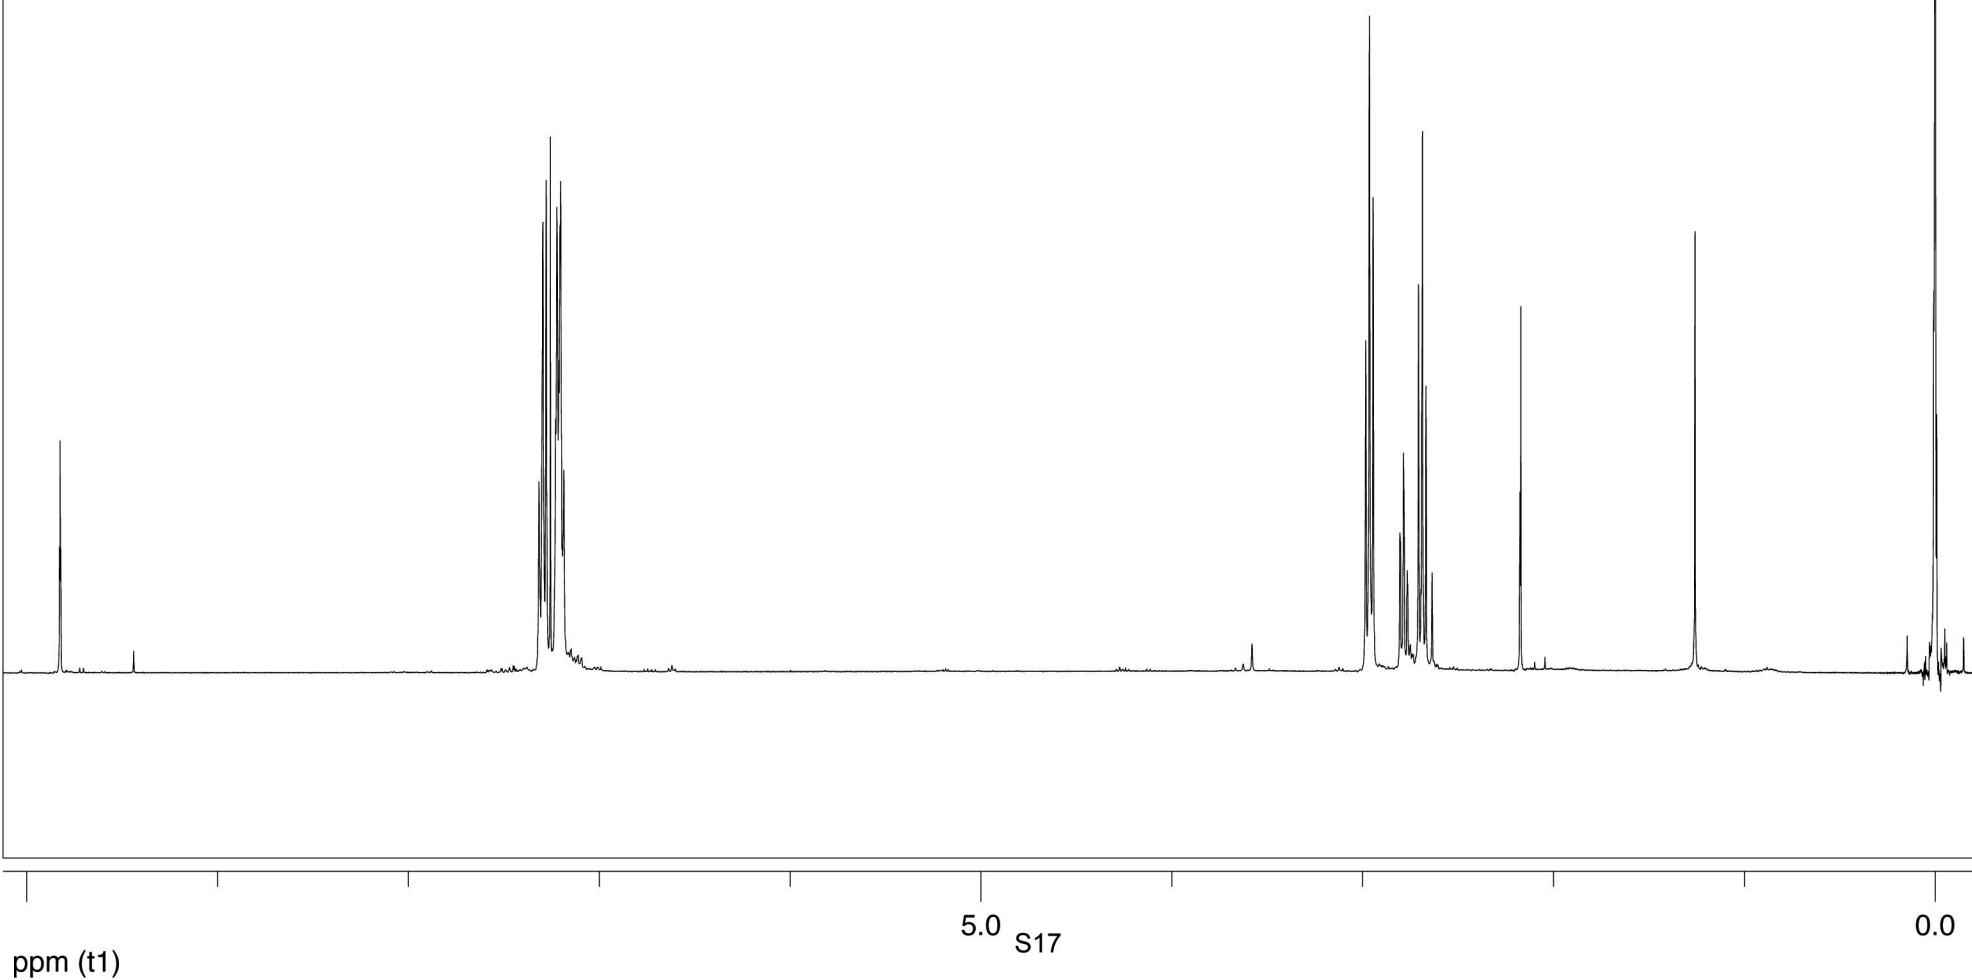

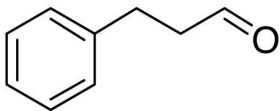

Supplementary Material (ESI) for Chemical Communications  
This journal is (c) The Royal Society of Chemistry 2007

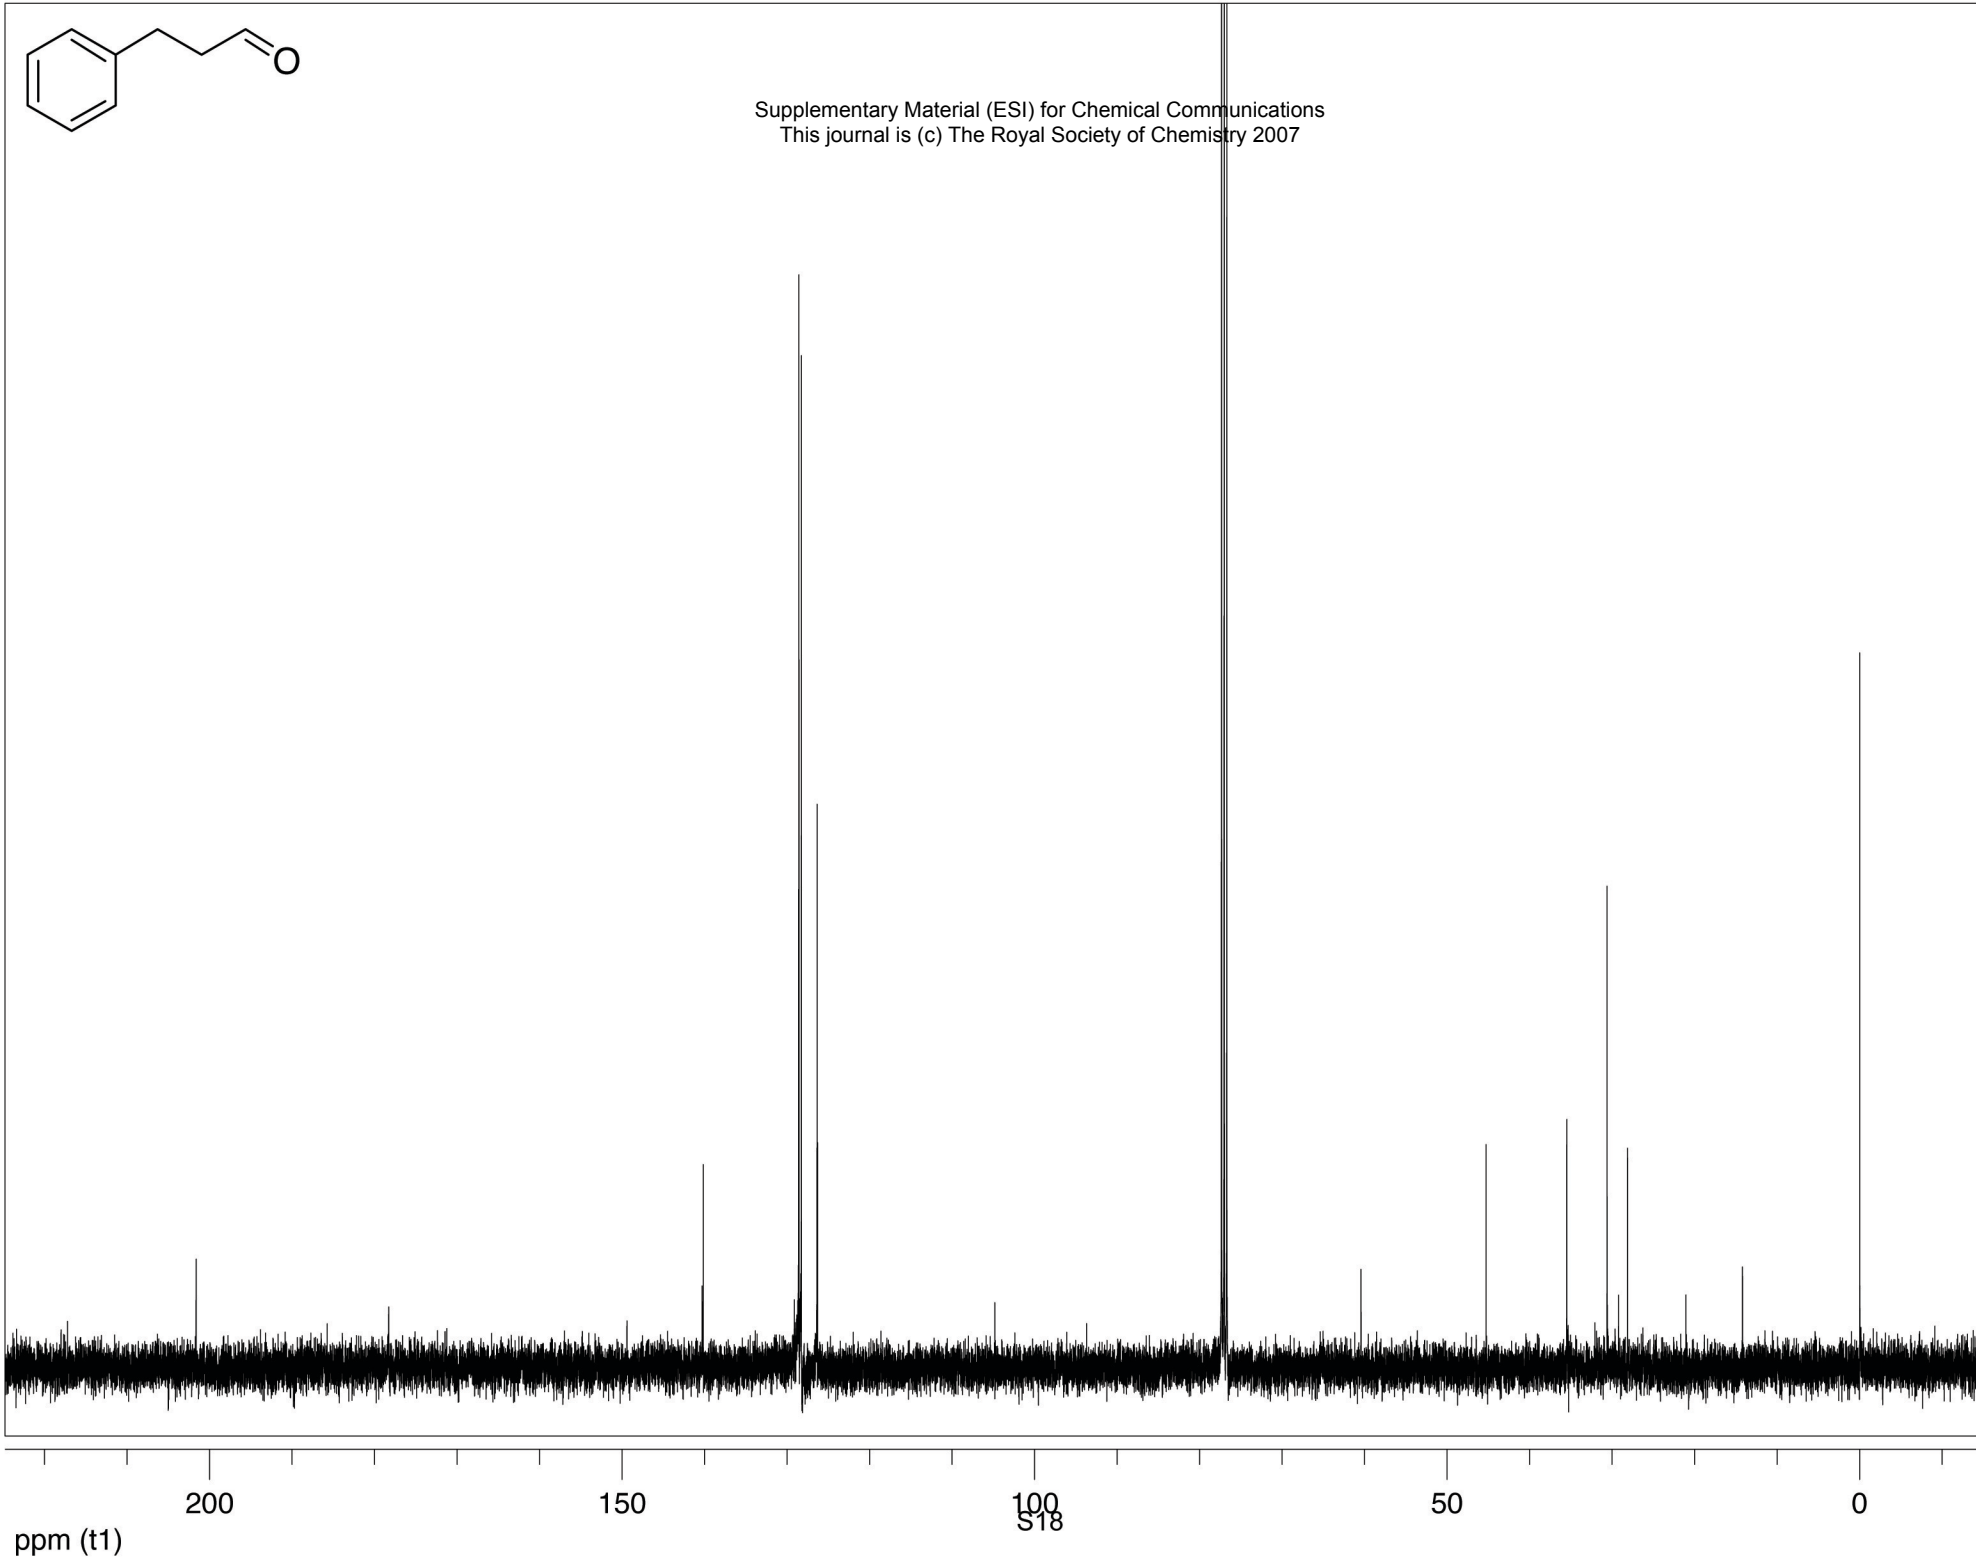

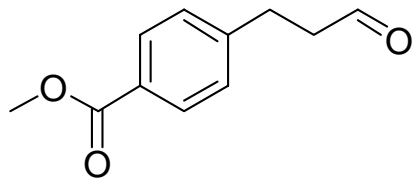

Supplementary Material (ESI) for Chemical Communications  
This journal is (c) The Royal Society of Chemistry 2007

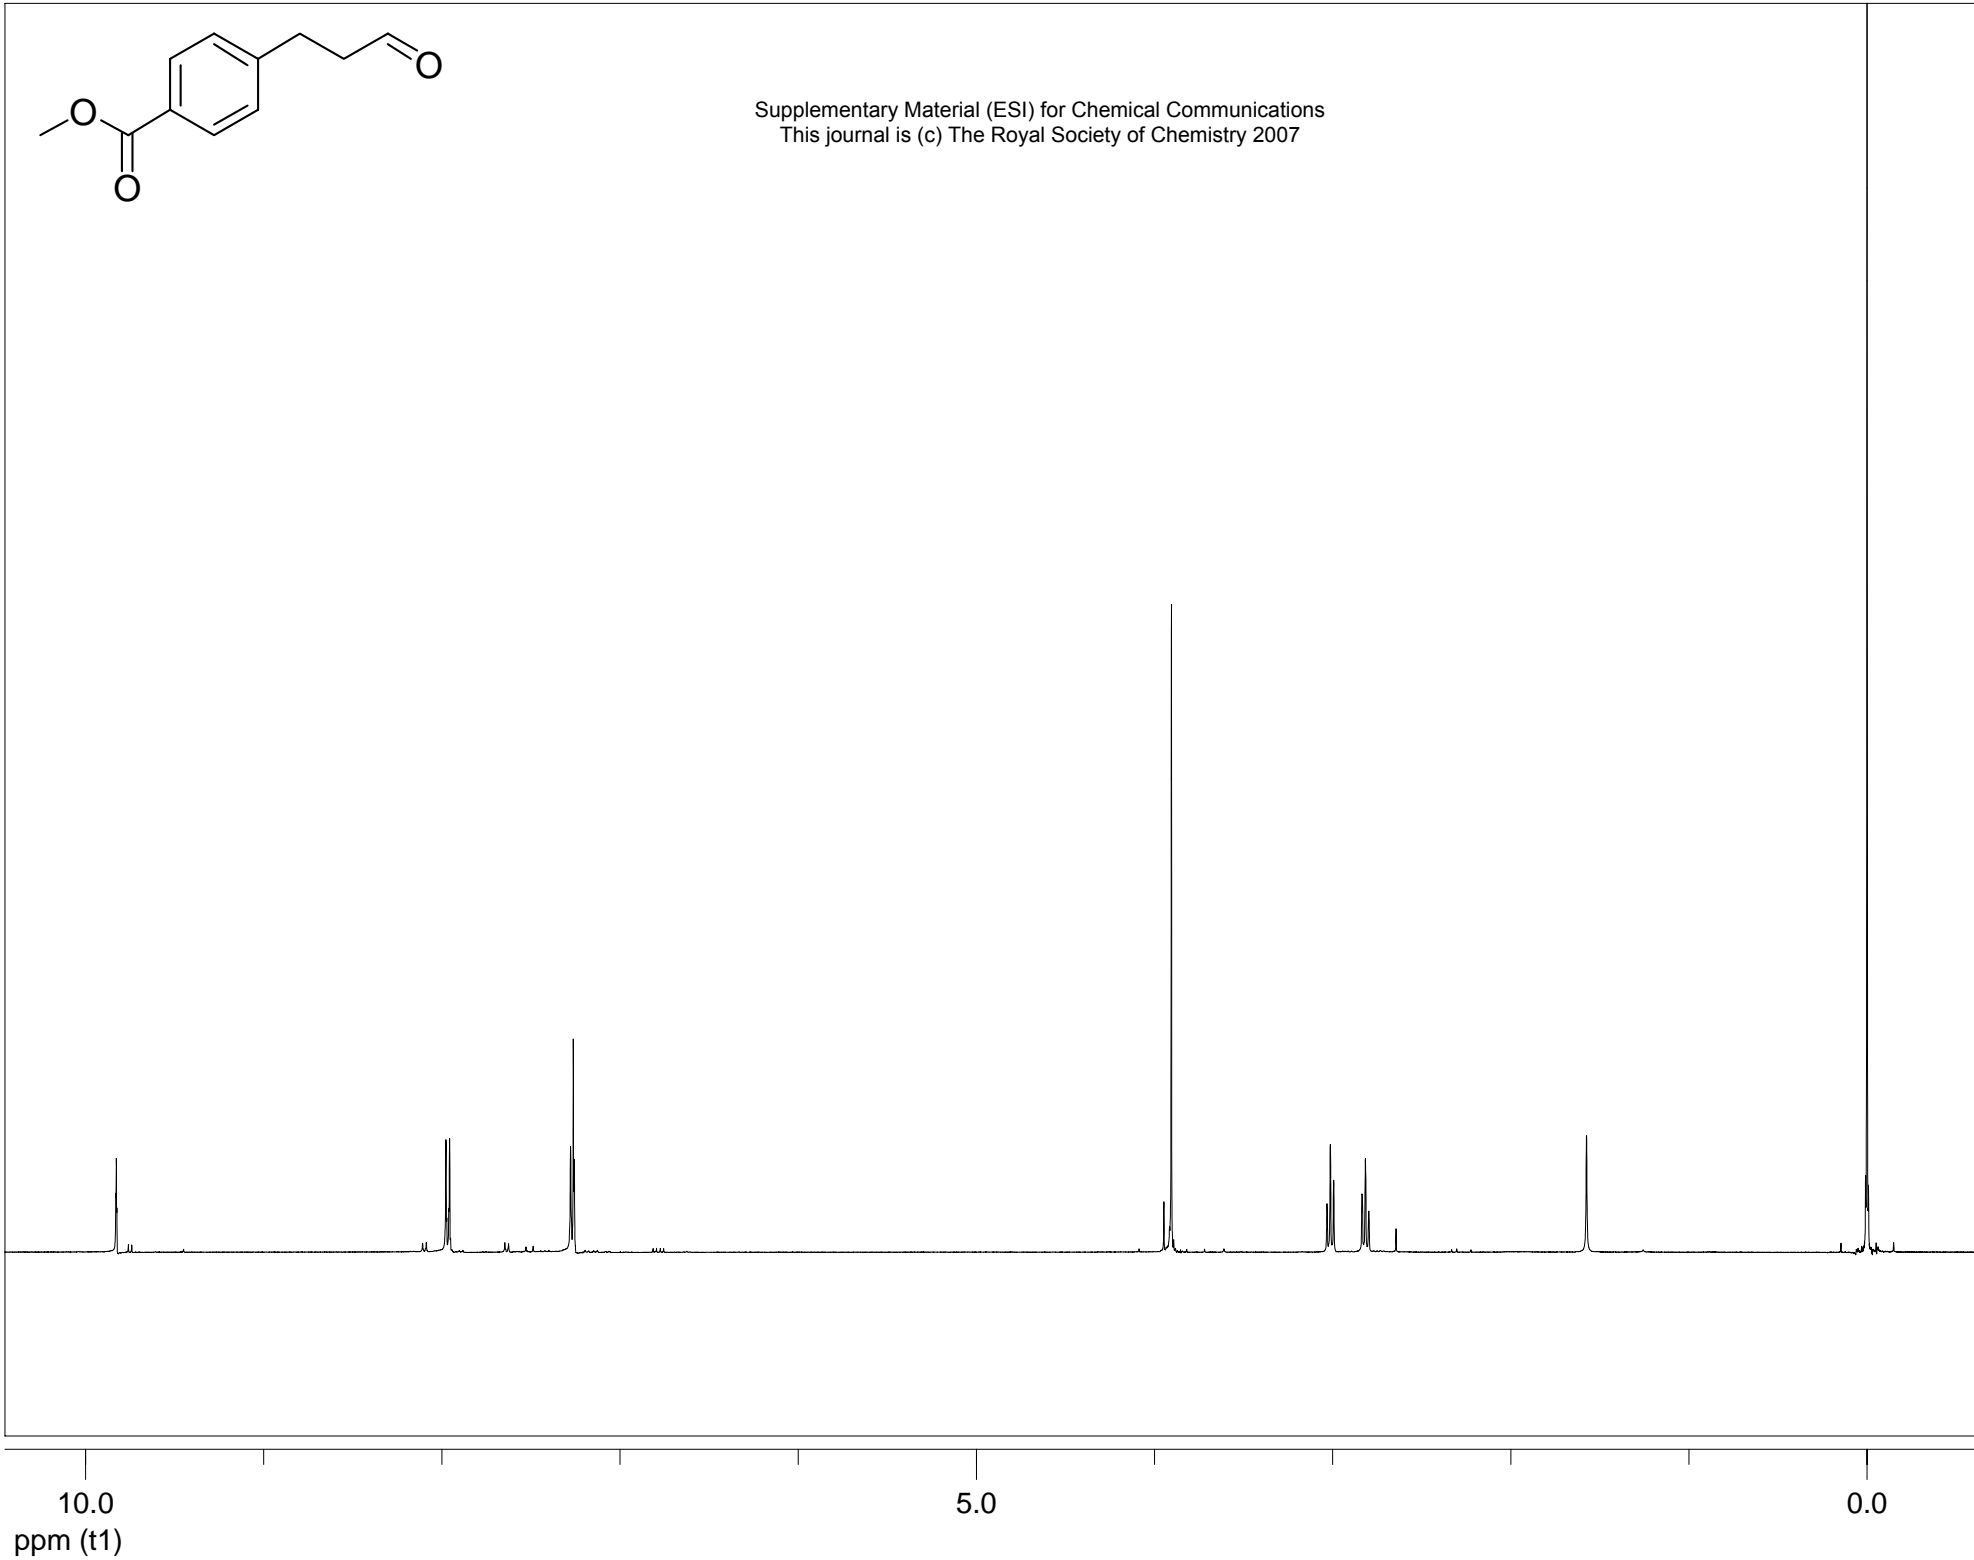

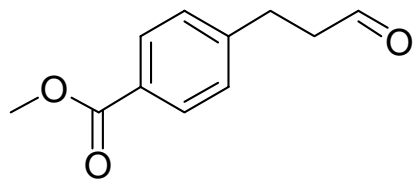

Supplementary Material (ESI) for Chemical Communications  
This journal is (c) The Royal Society of Chemistry 2007

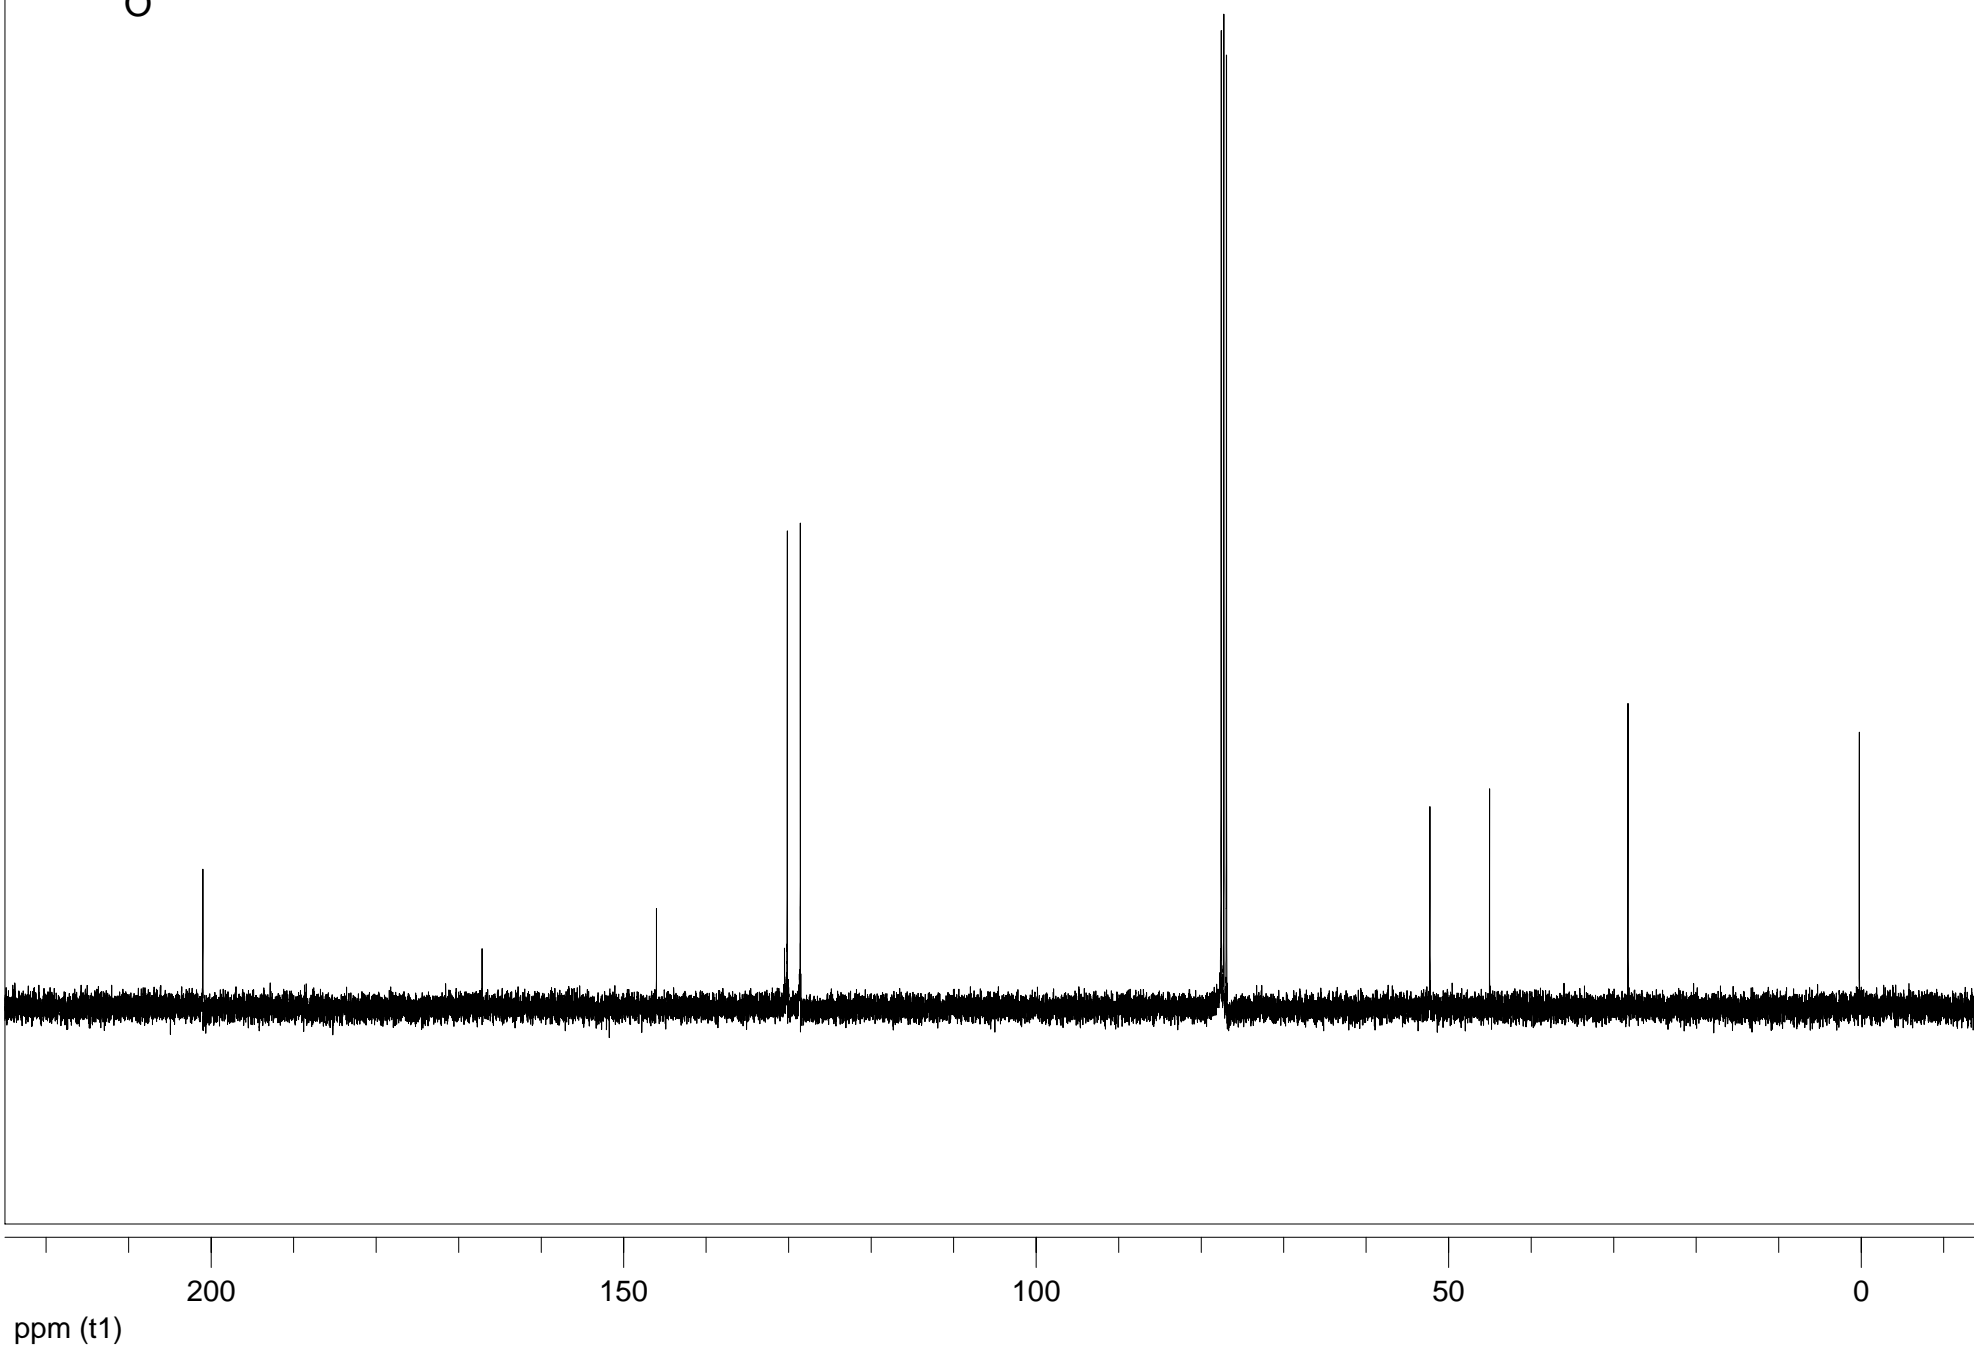



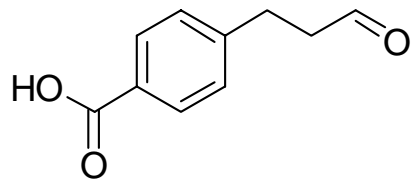

Supplementary Material (ESI) for Chemical Communications  
This journal is (c) The Royal Society of Chemistry 2007

10.0  
0.86

2.03

2.00

2.43  
2.56

0.0

ppm (t1)

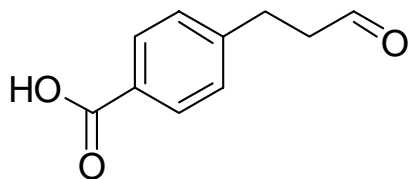

Supplementary Material (ESI) for Chemical Communications  
This journal is (c) The Royal Society of Chemistry 2007

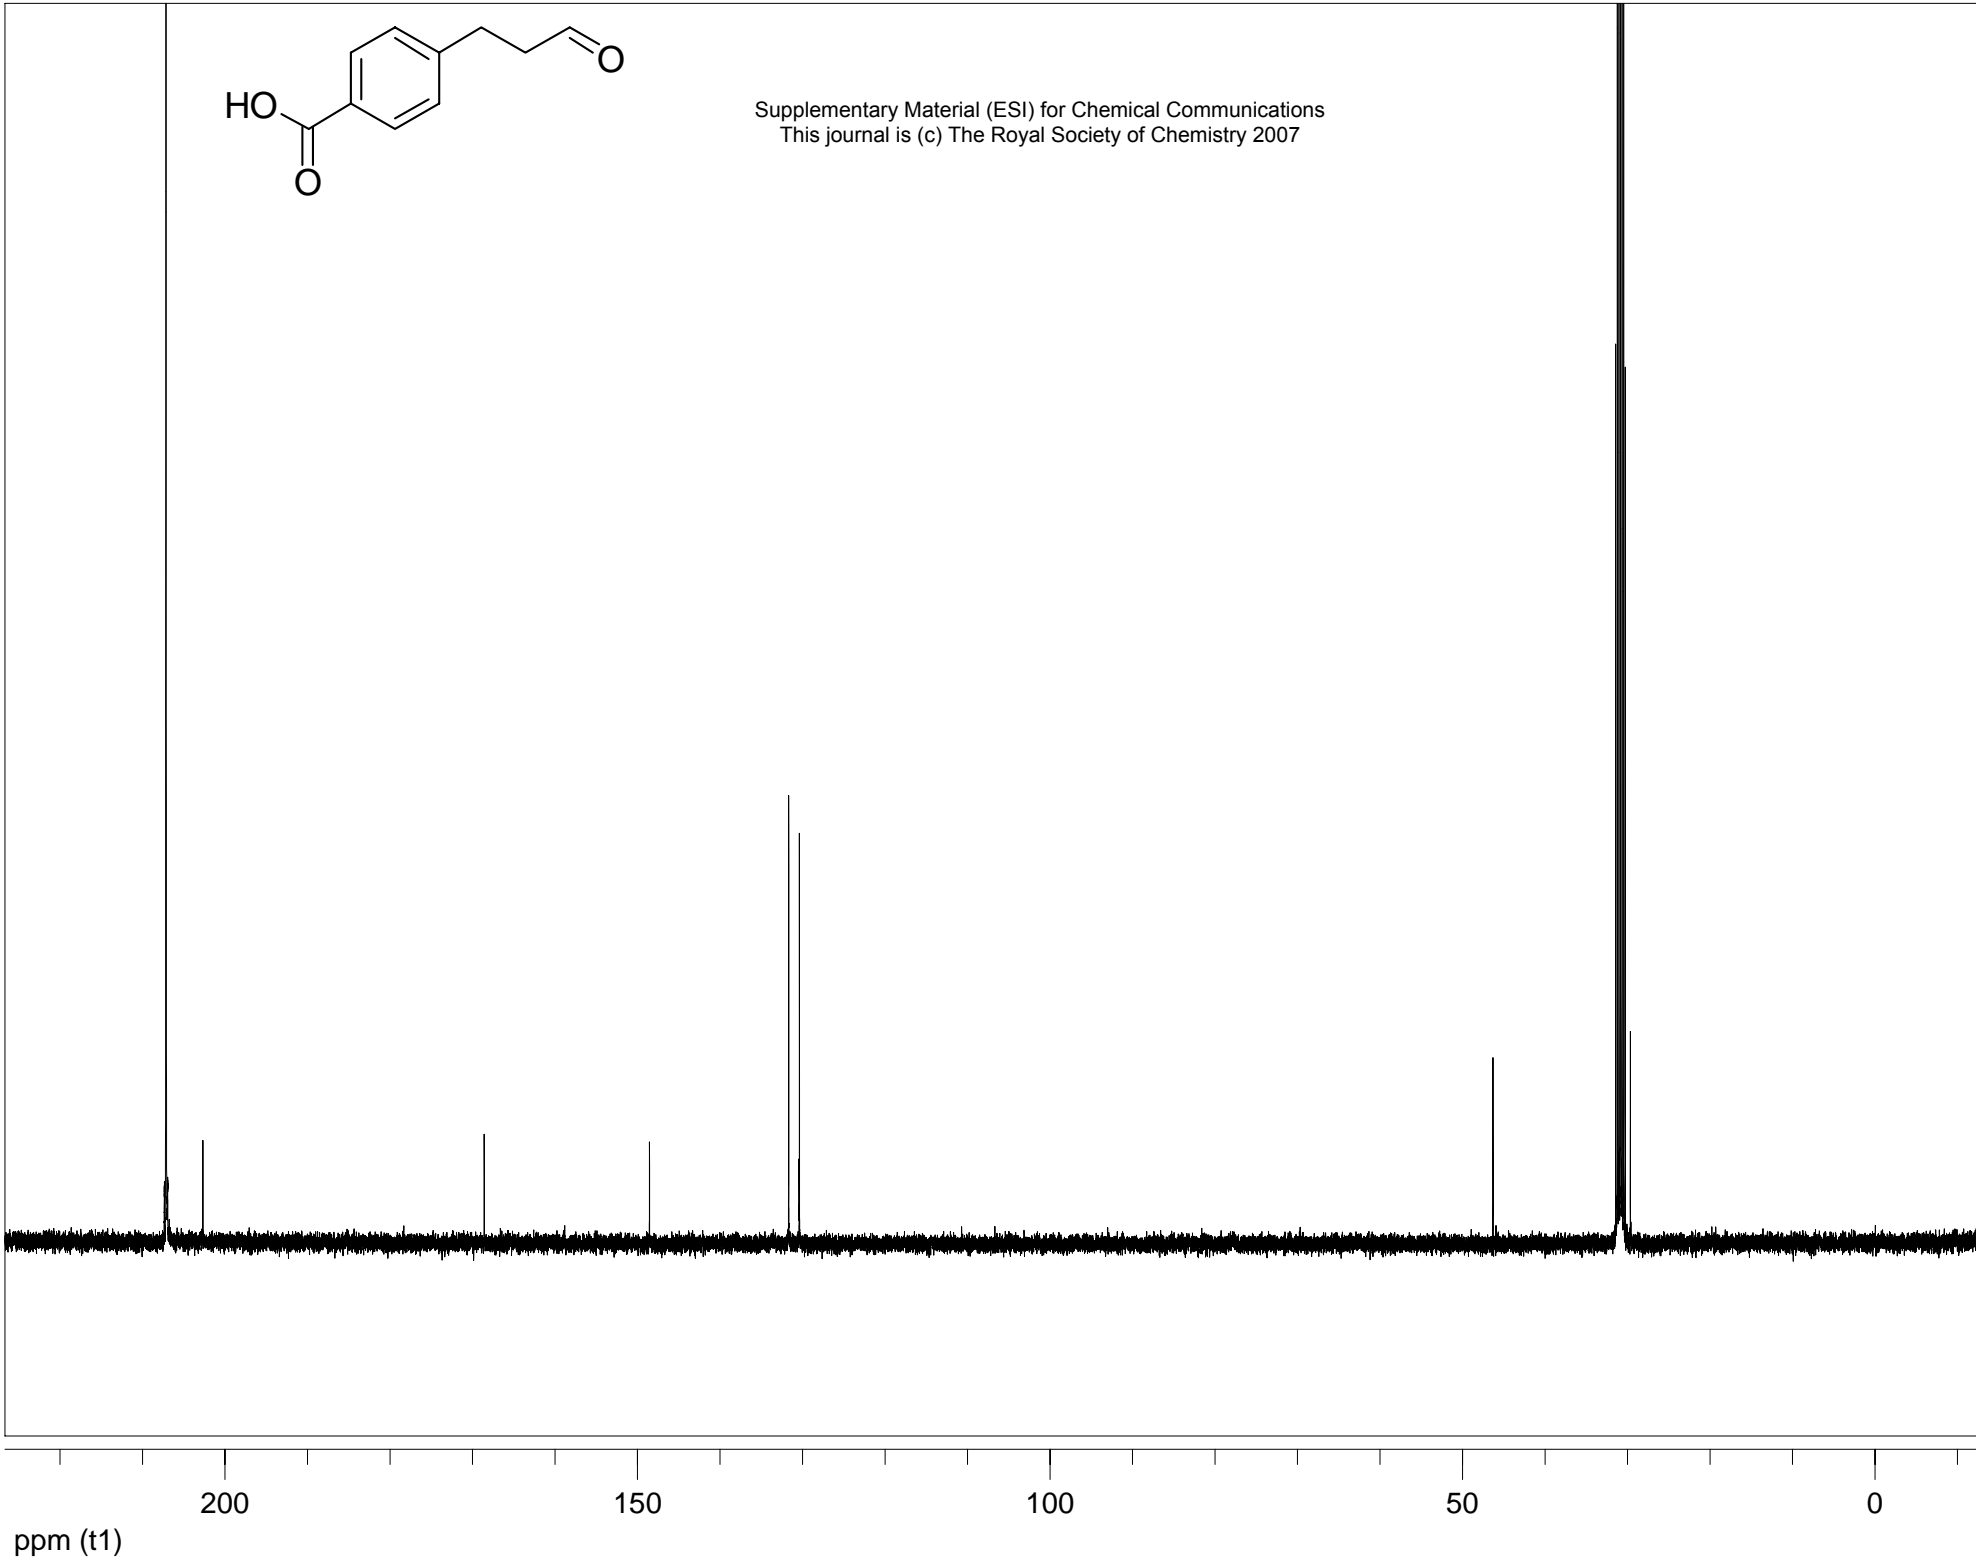

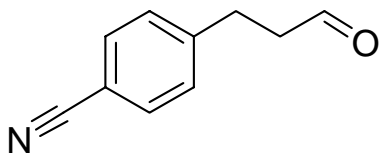

Supplementary Material (ESI) for Chemical Communications  
This journal is (c) The Royal Society of Chemistry 2007

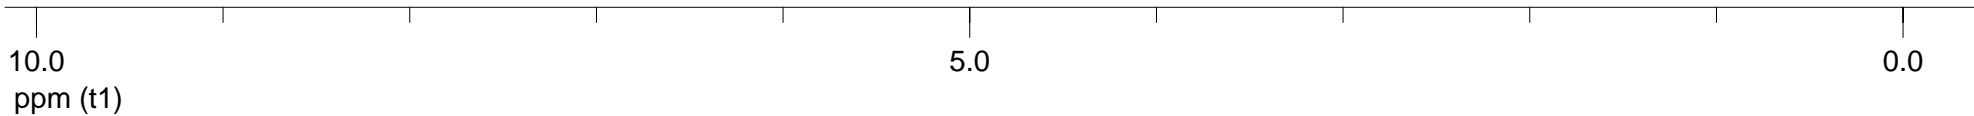

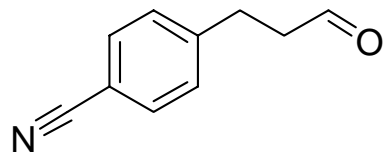

Supplementary Material (ESI) for Chemical Communications  
This journal is (c) The Royal Society of Chemistry 2007

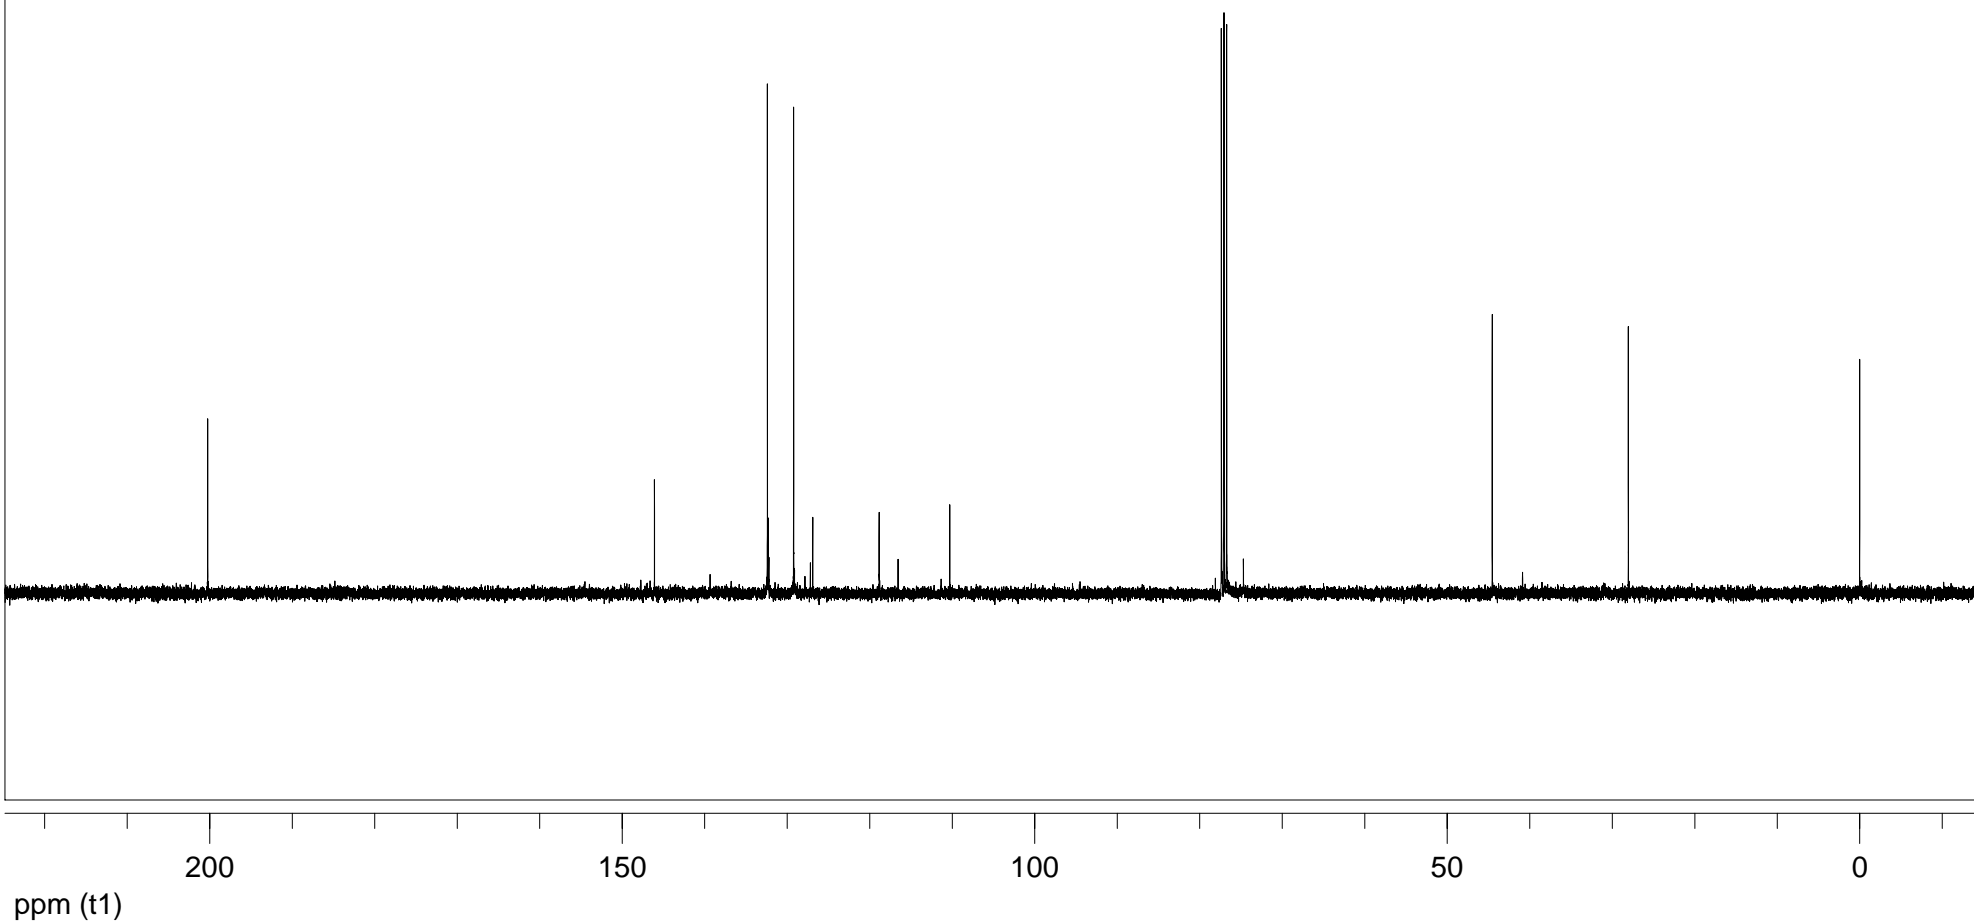

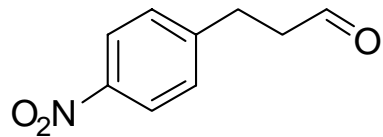

Supplementary Material (ESI) for Chemical Communications  
This journal is (c) The Royal Society of Chemistry 2007

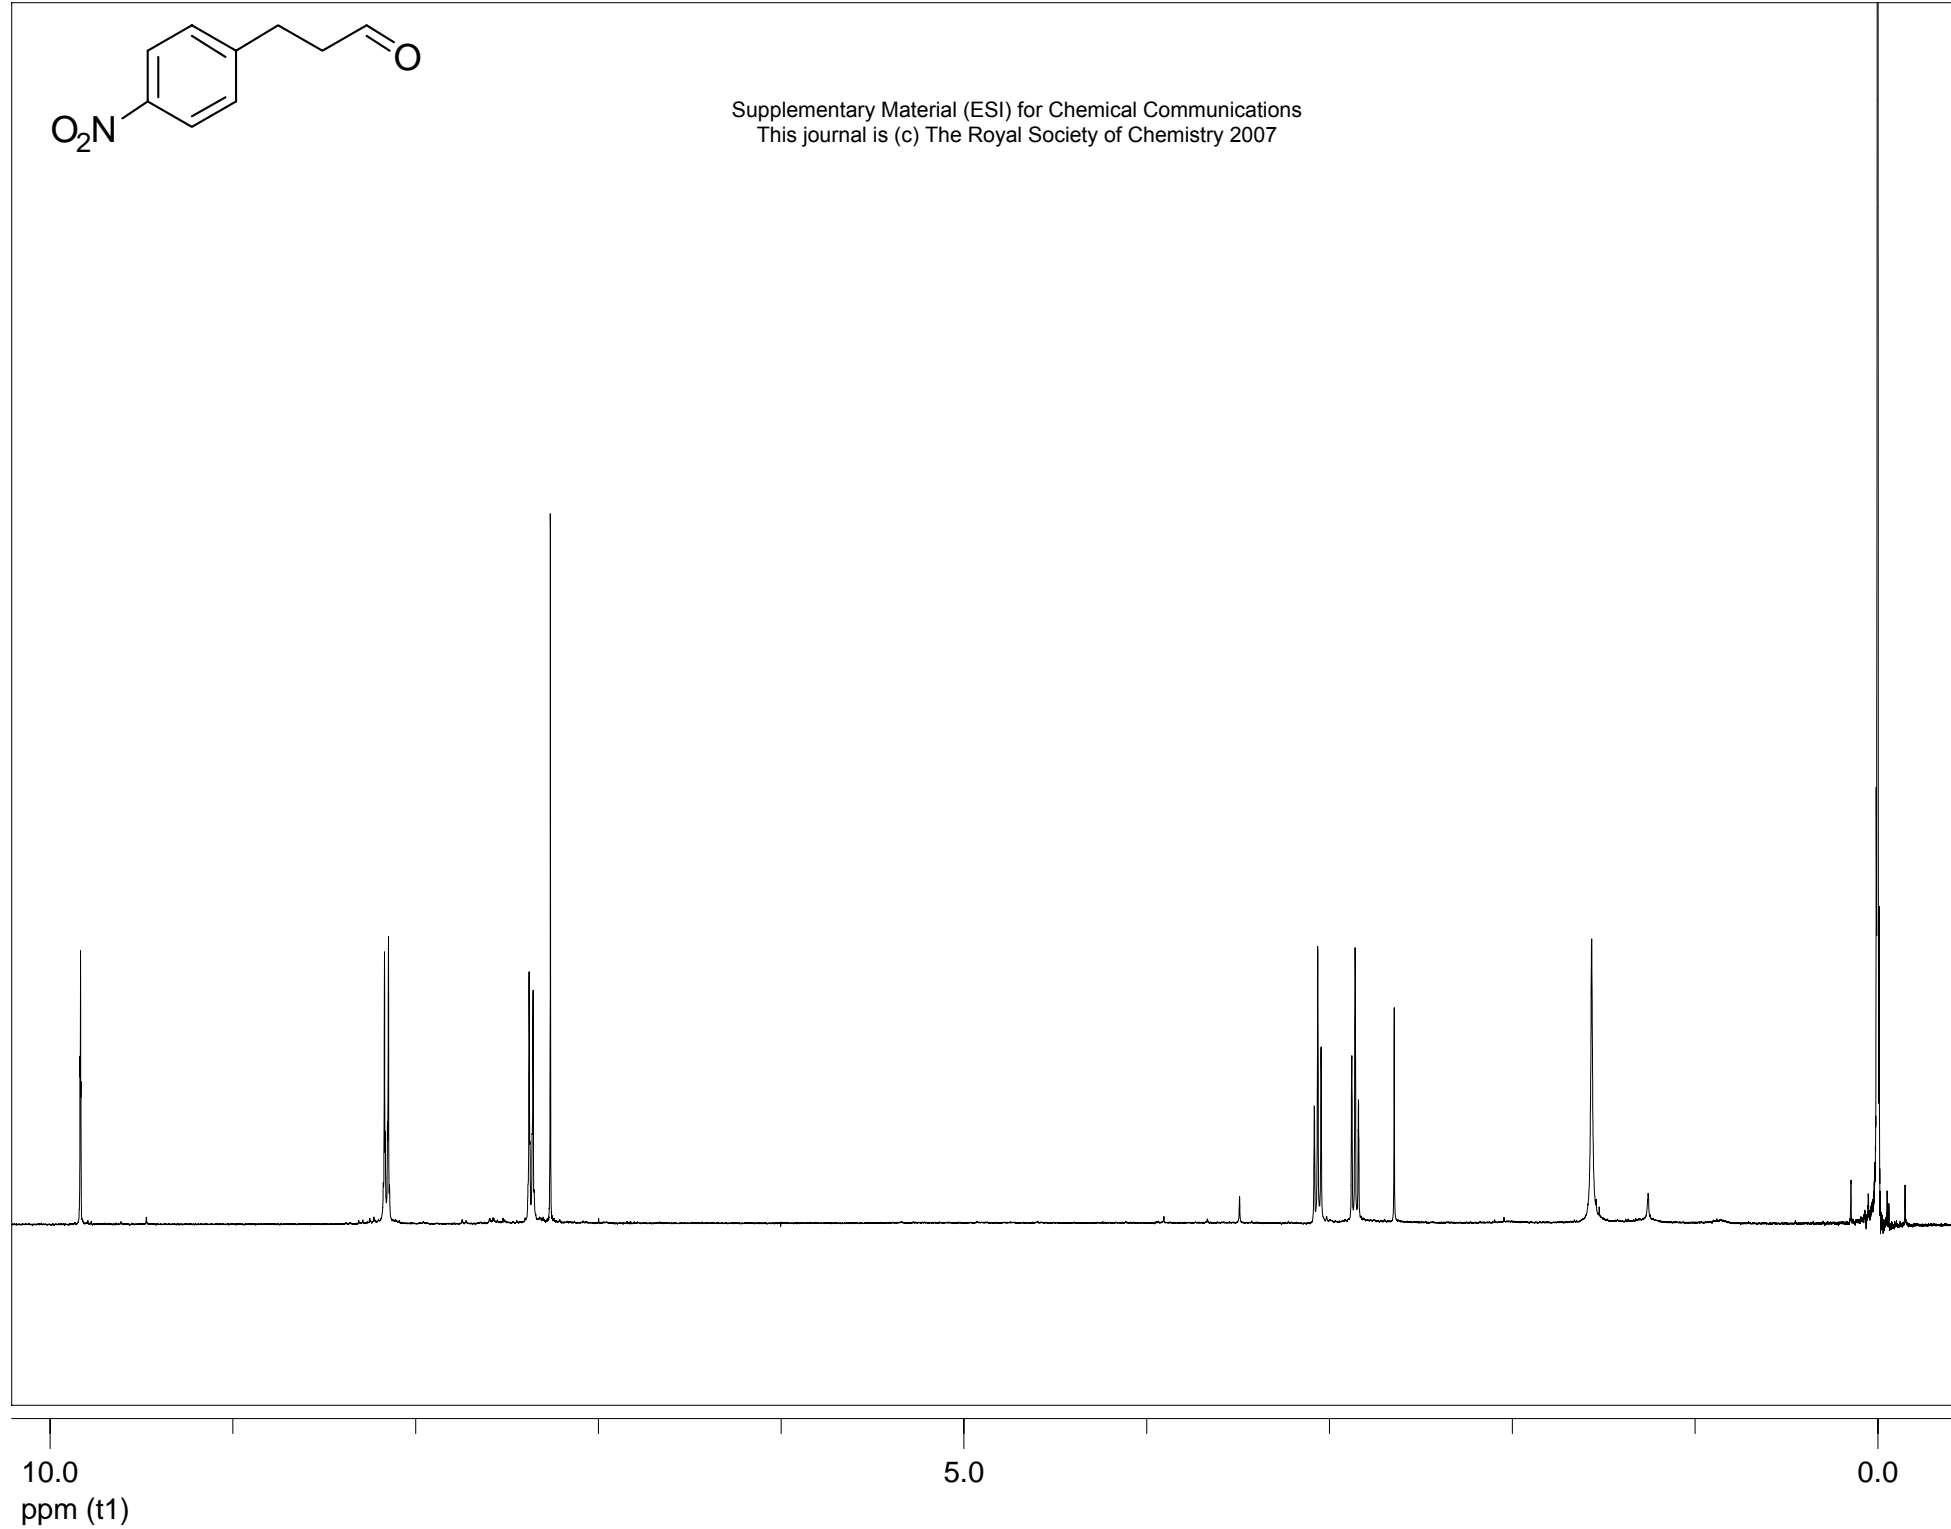

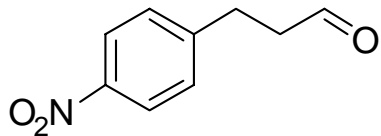

Supplementary Material (ESI) for Chemical Communications  
This journal is (c) The Royal Society of Chemistry 2007

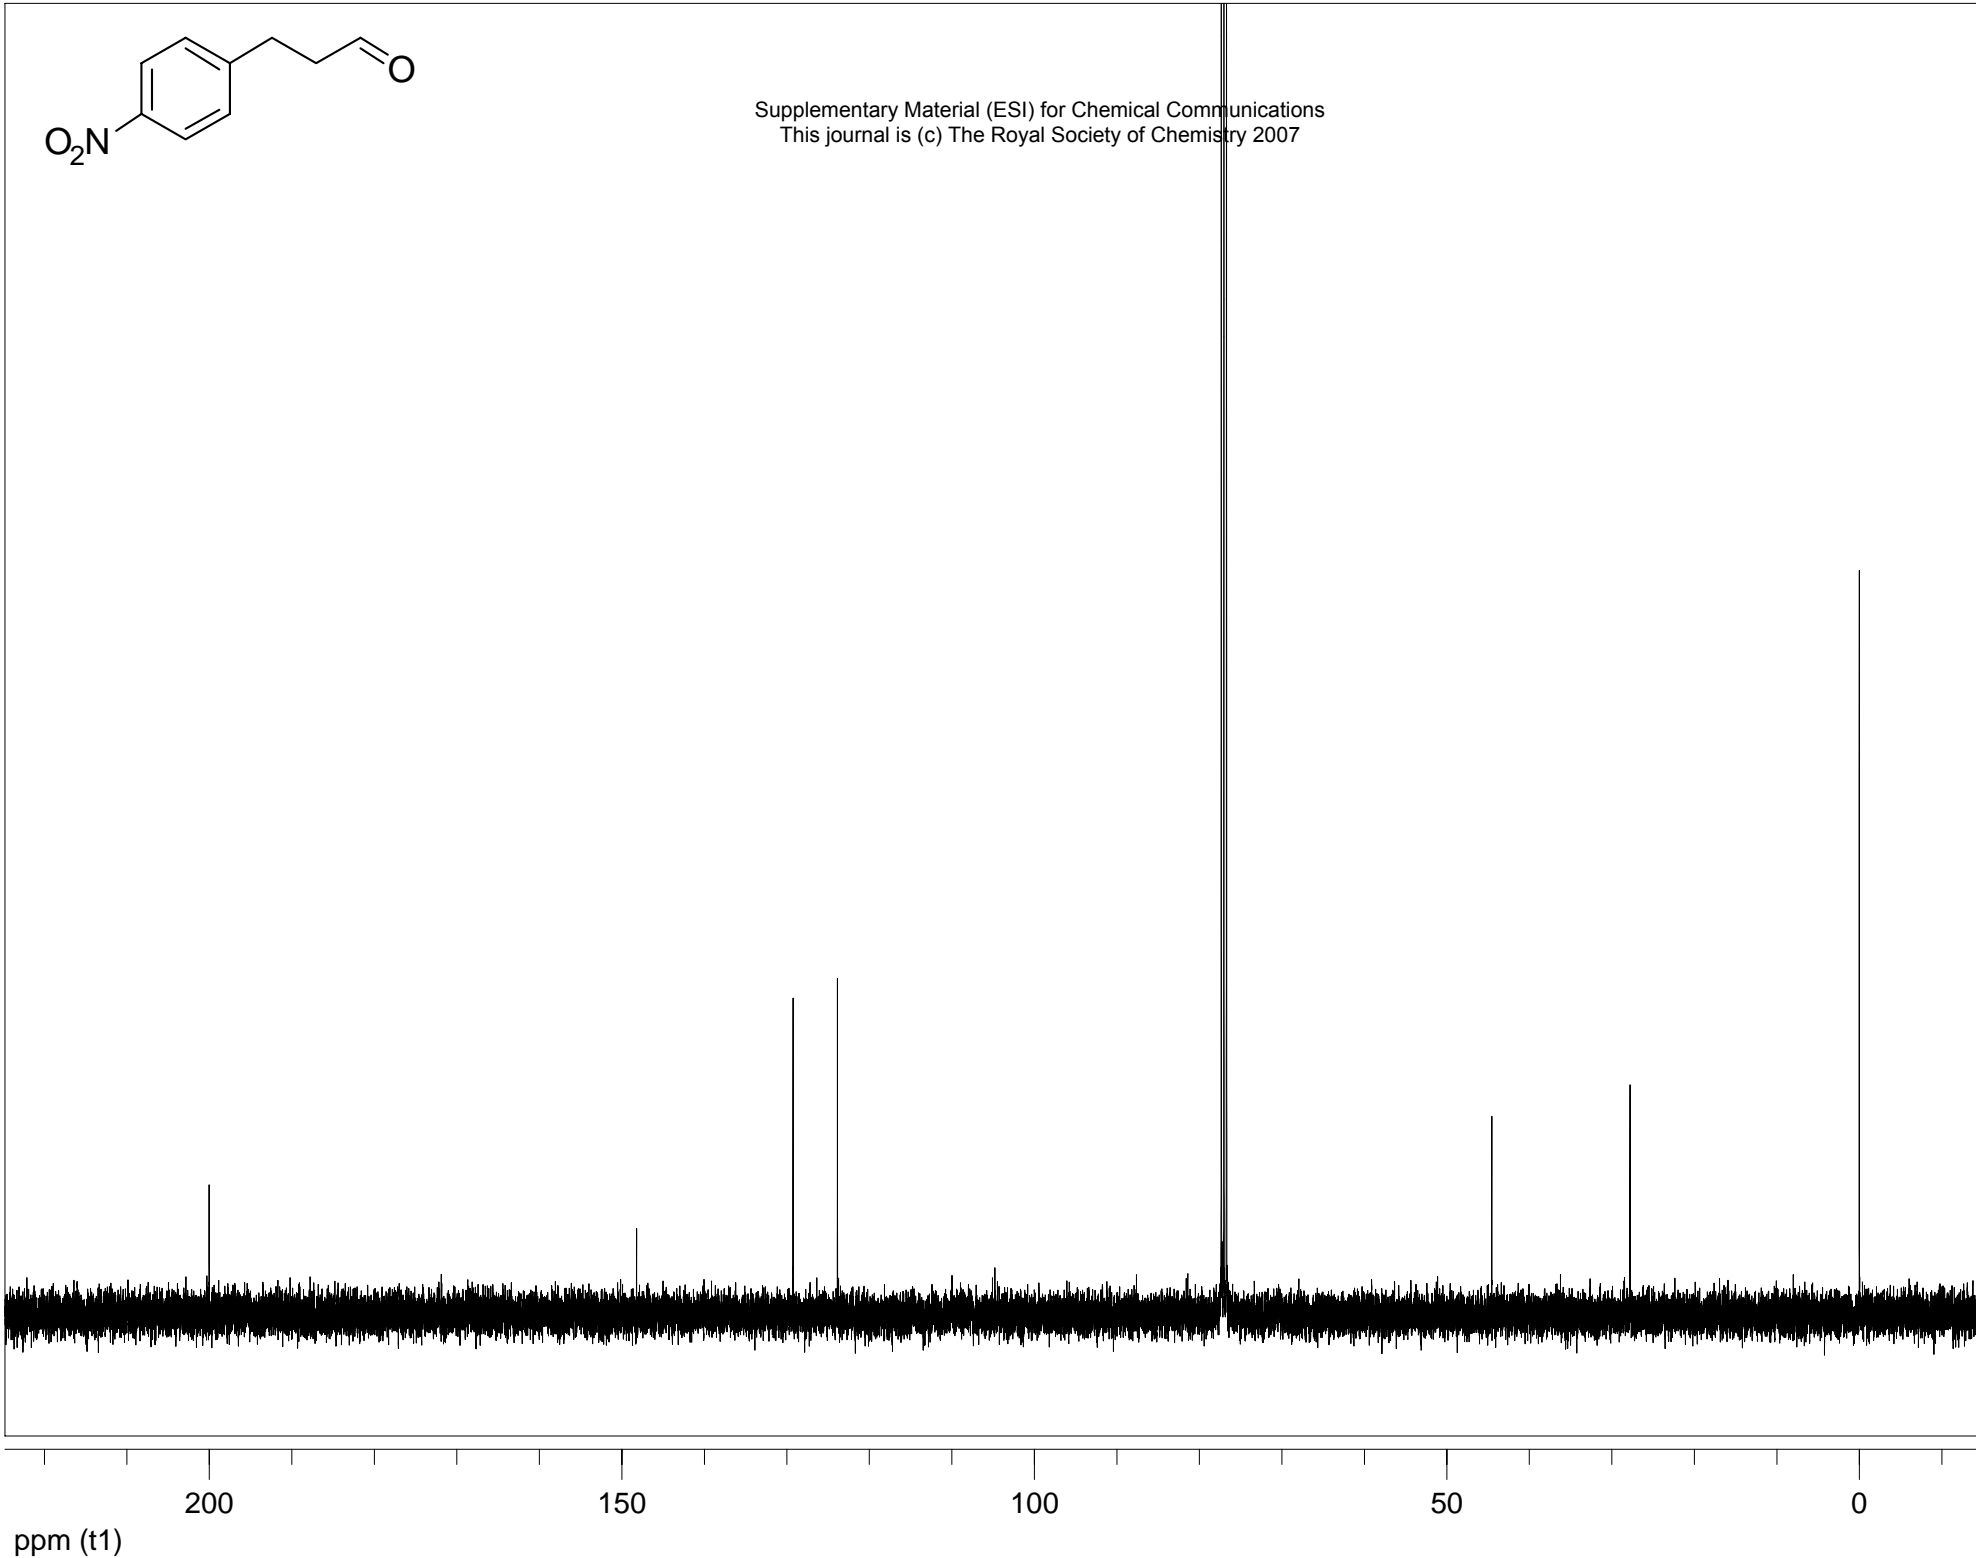

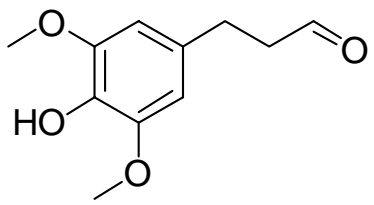

Supplementary Material (ESI) for Chemical Communications  
This journal is (c) The Royal Society of Chemistry 2007

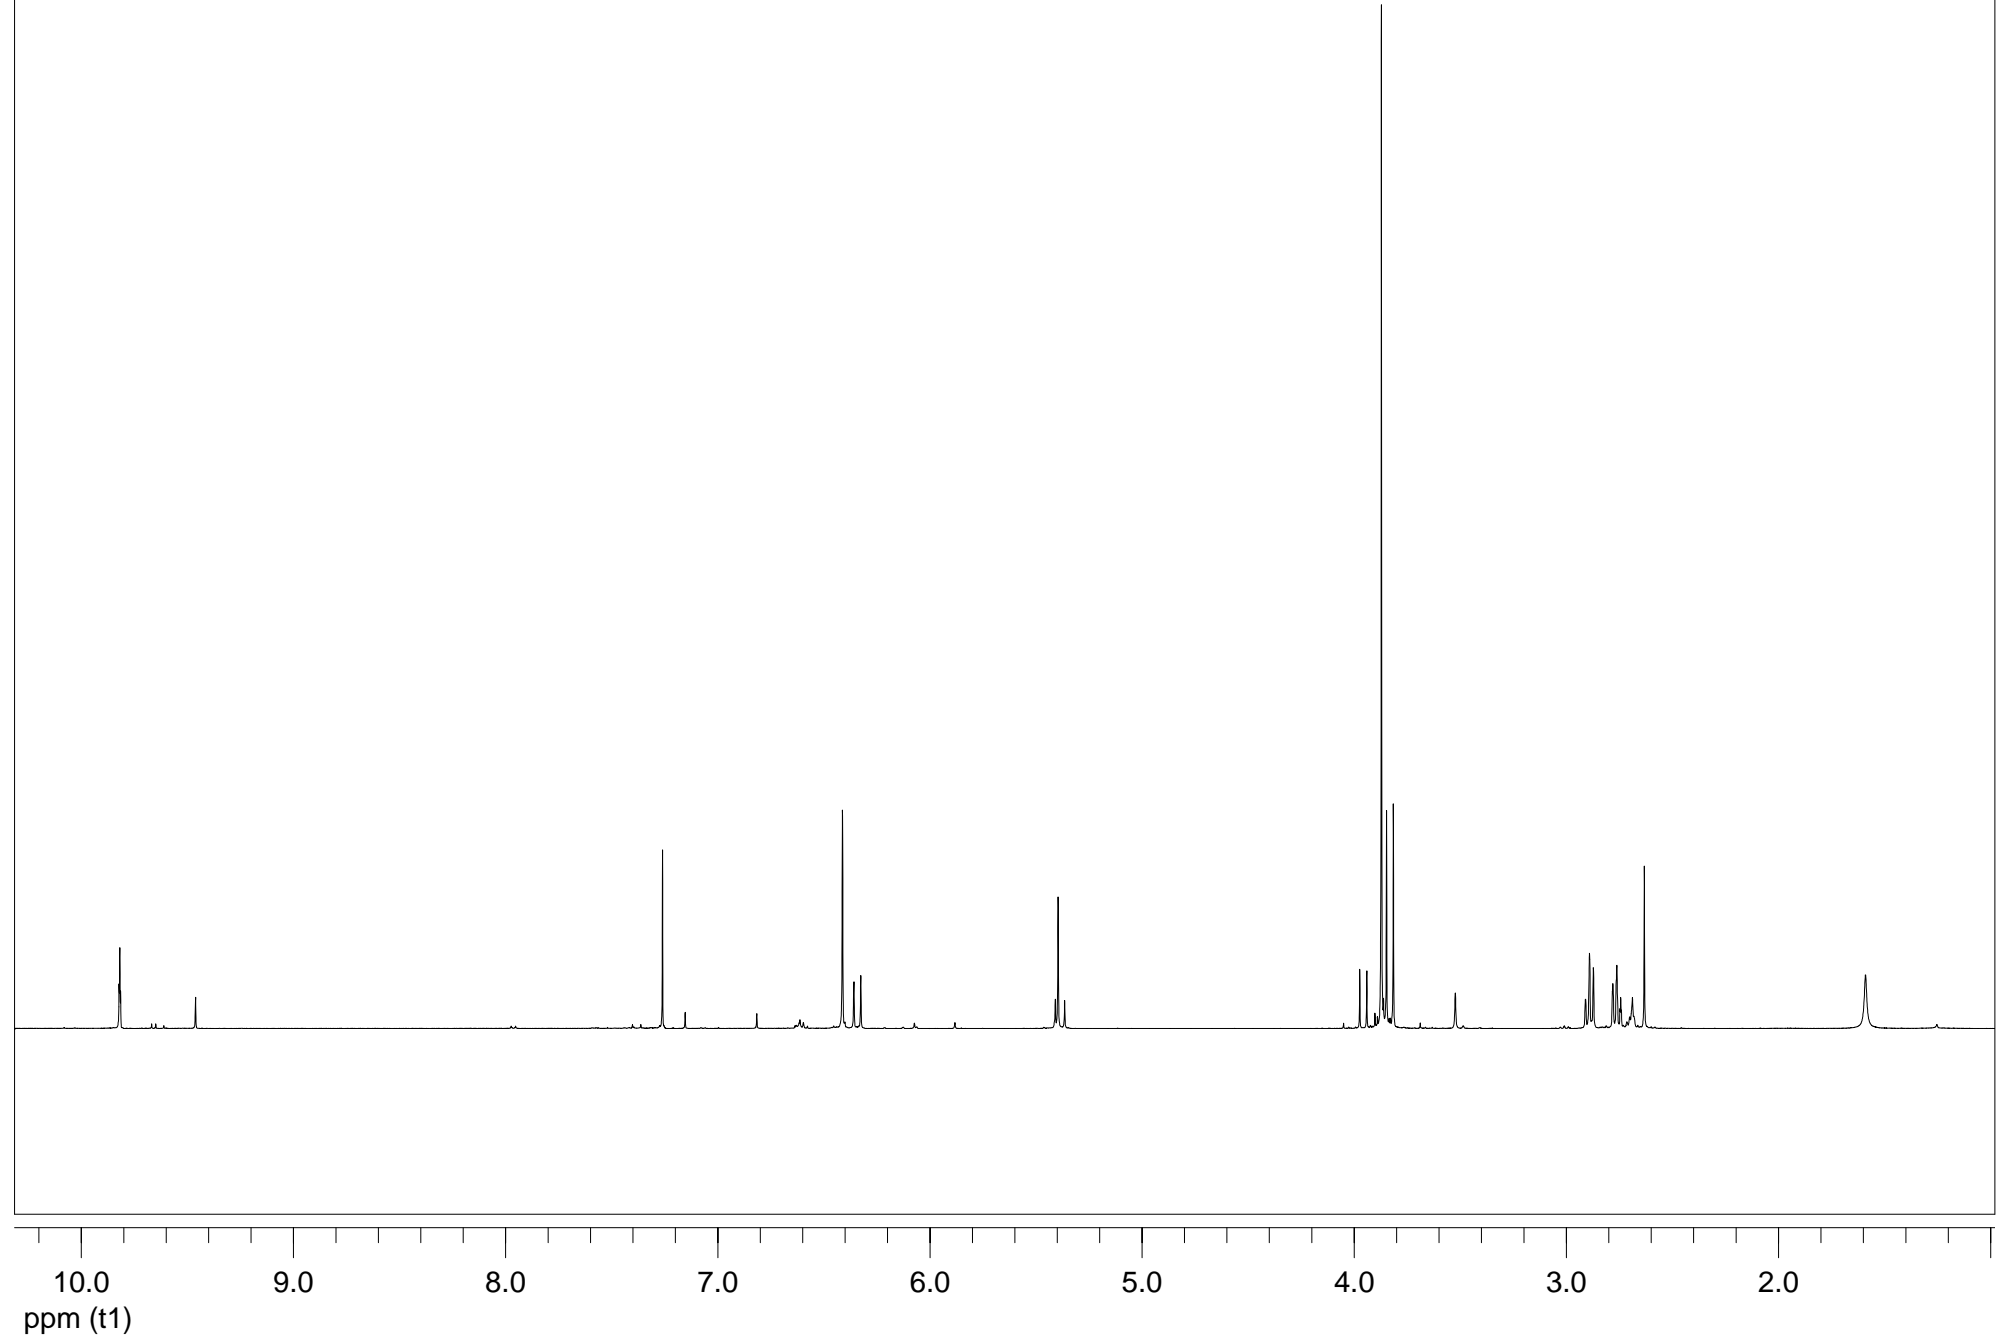

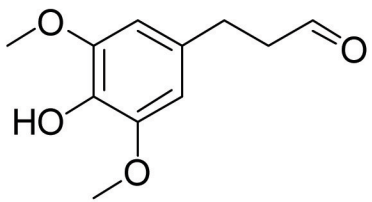

Supplementary Material (ESI) for Chemical Communications  
This journal is (c) The Royal Society of Chemistry 2007

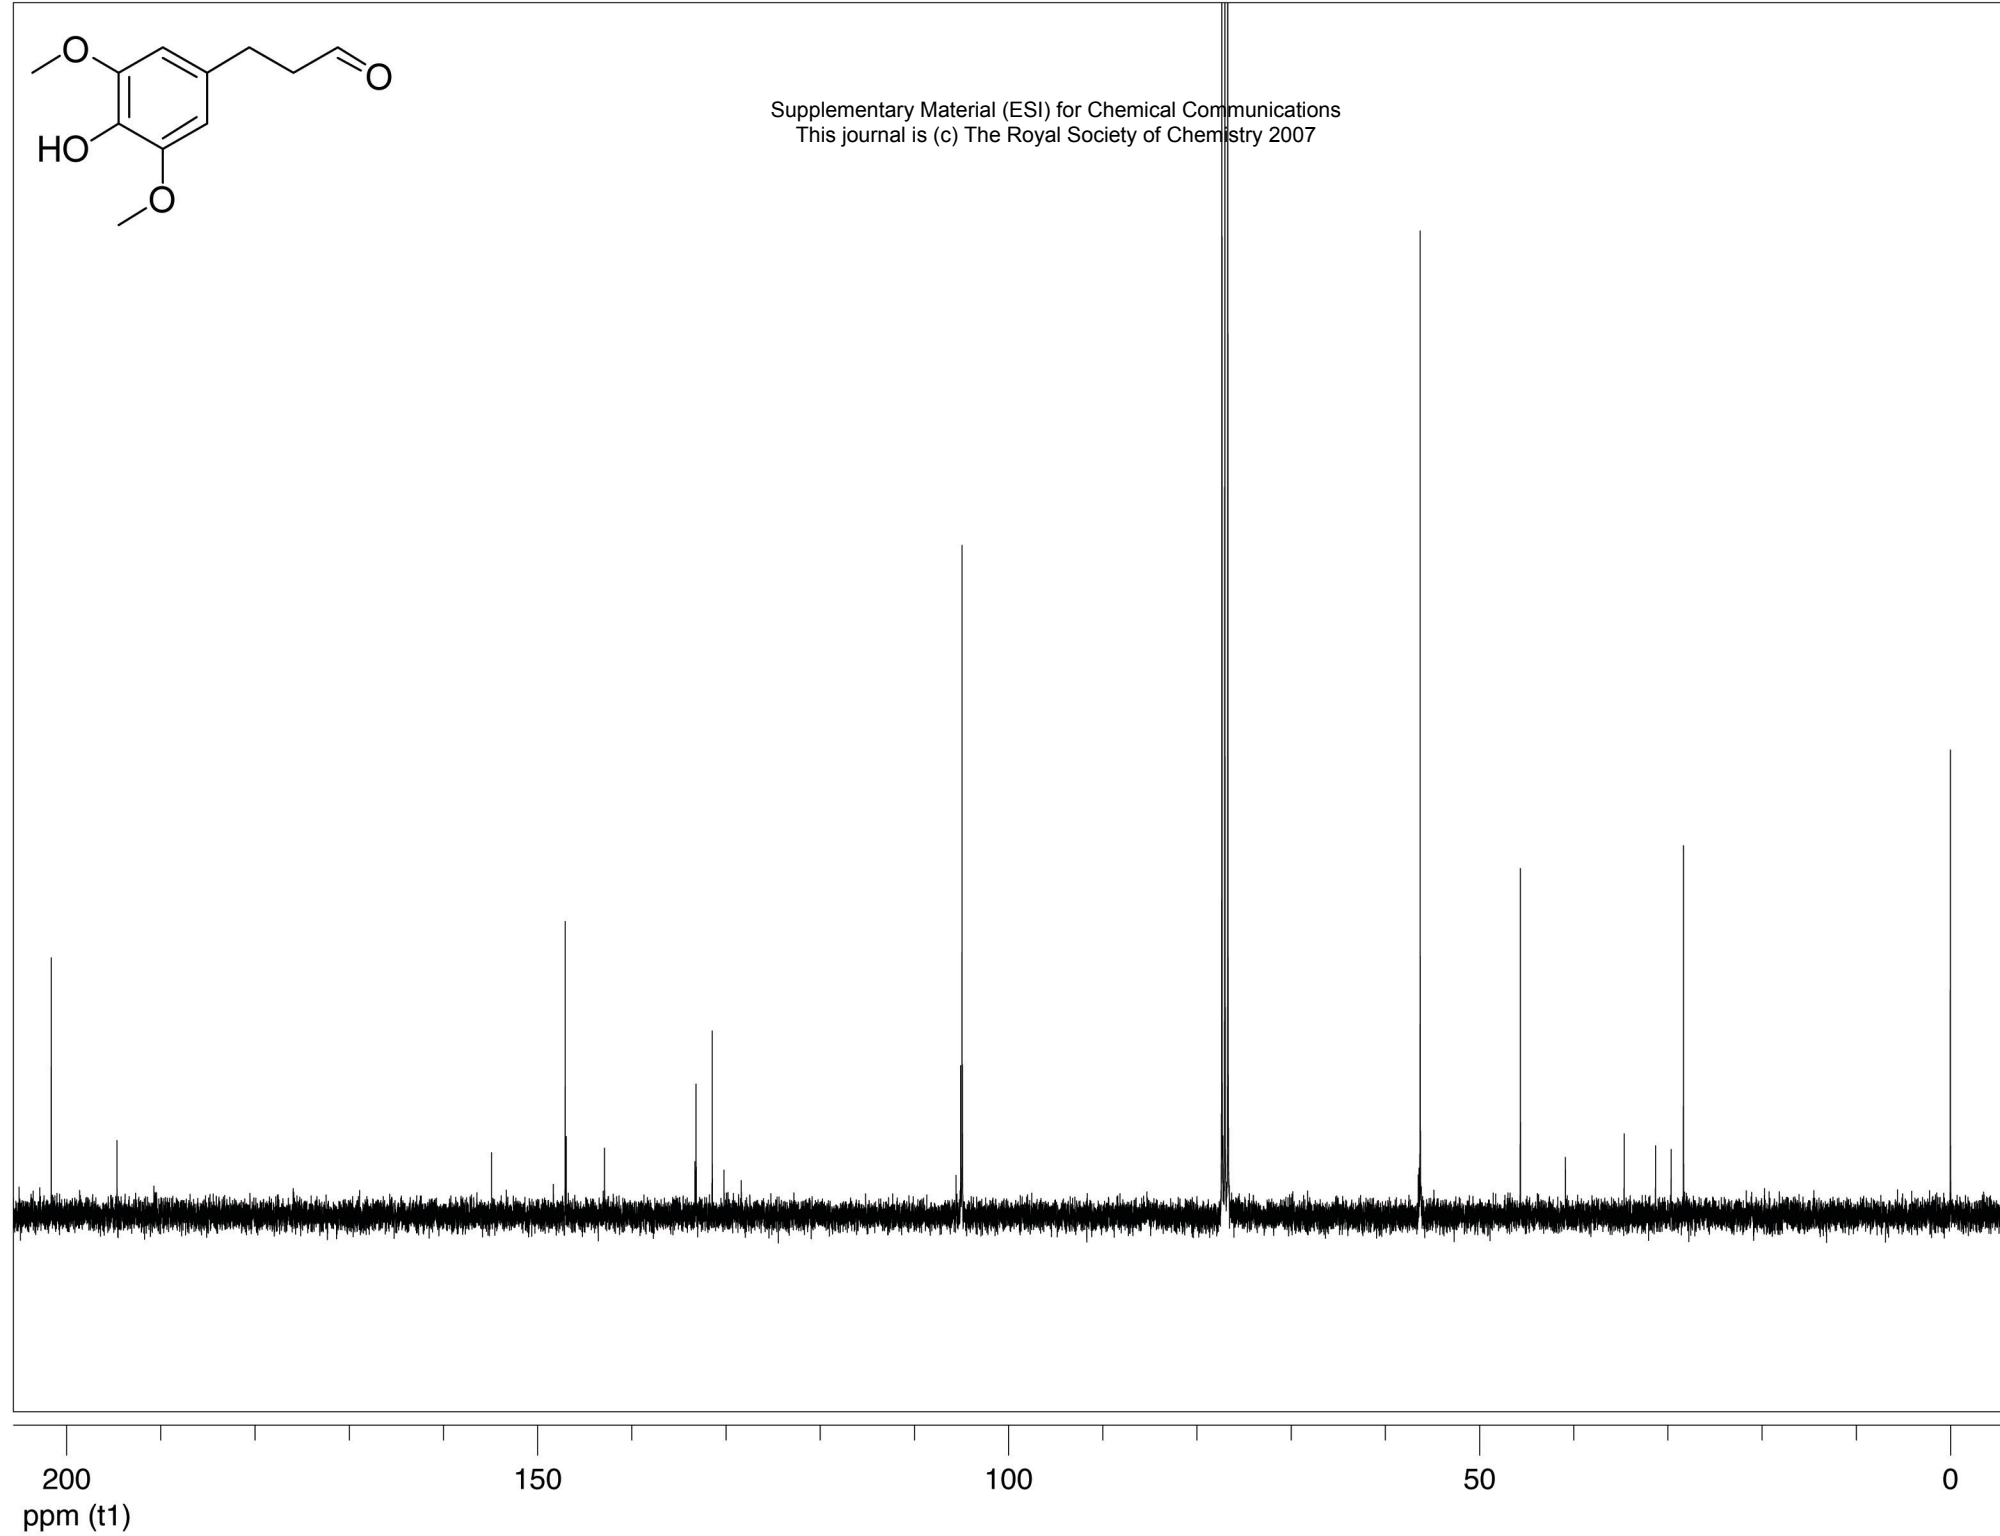



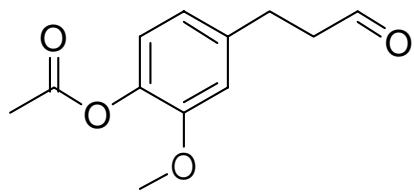

Supplementary Material (ESI) for Chemical Communications  
This journal is (c) The Royal Society of Chemistry 2007

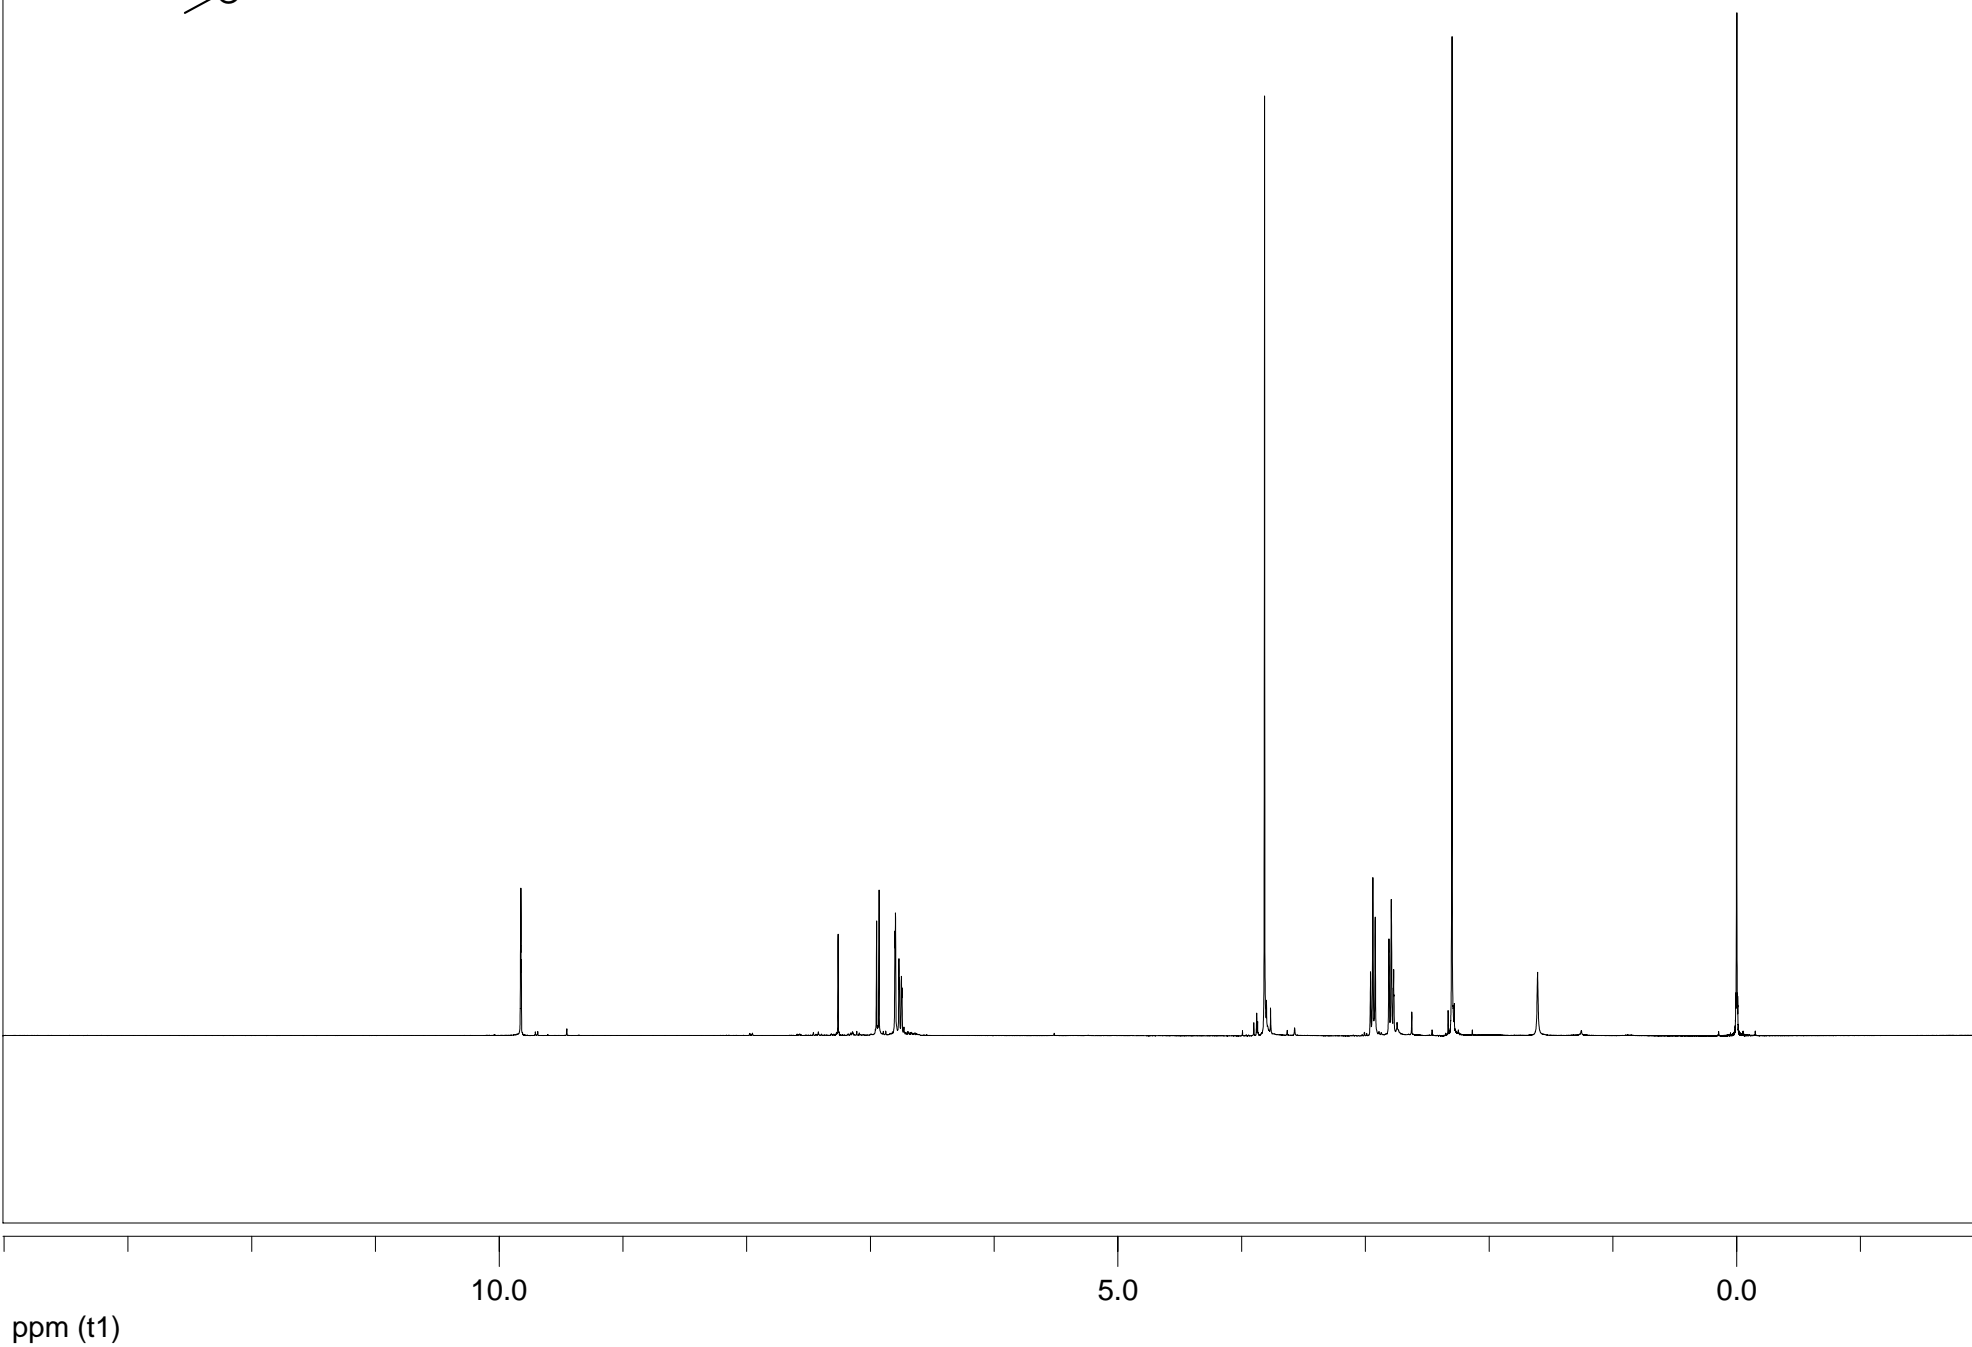

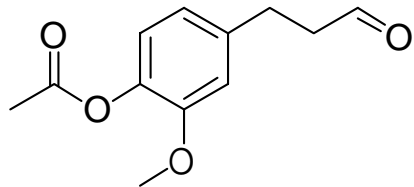

Supplementary Material (ESI) for Chemical Communications  
This journal is (c) The Royal Society of Chemistry 2007

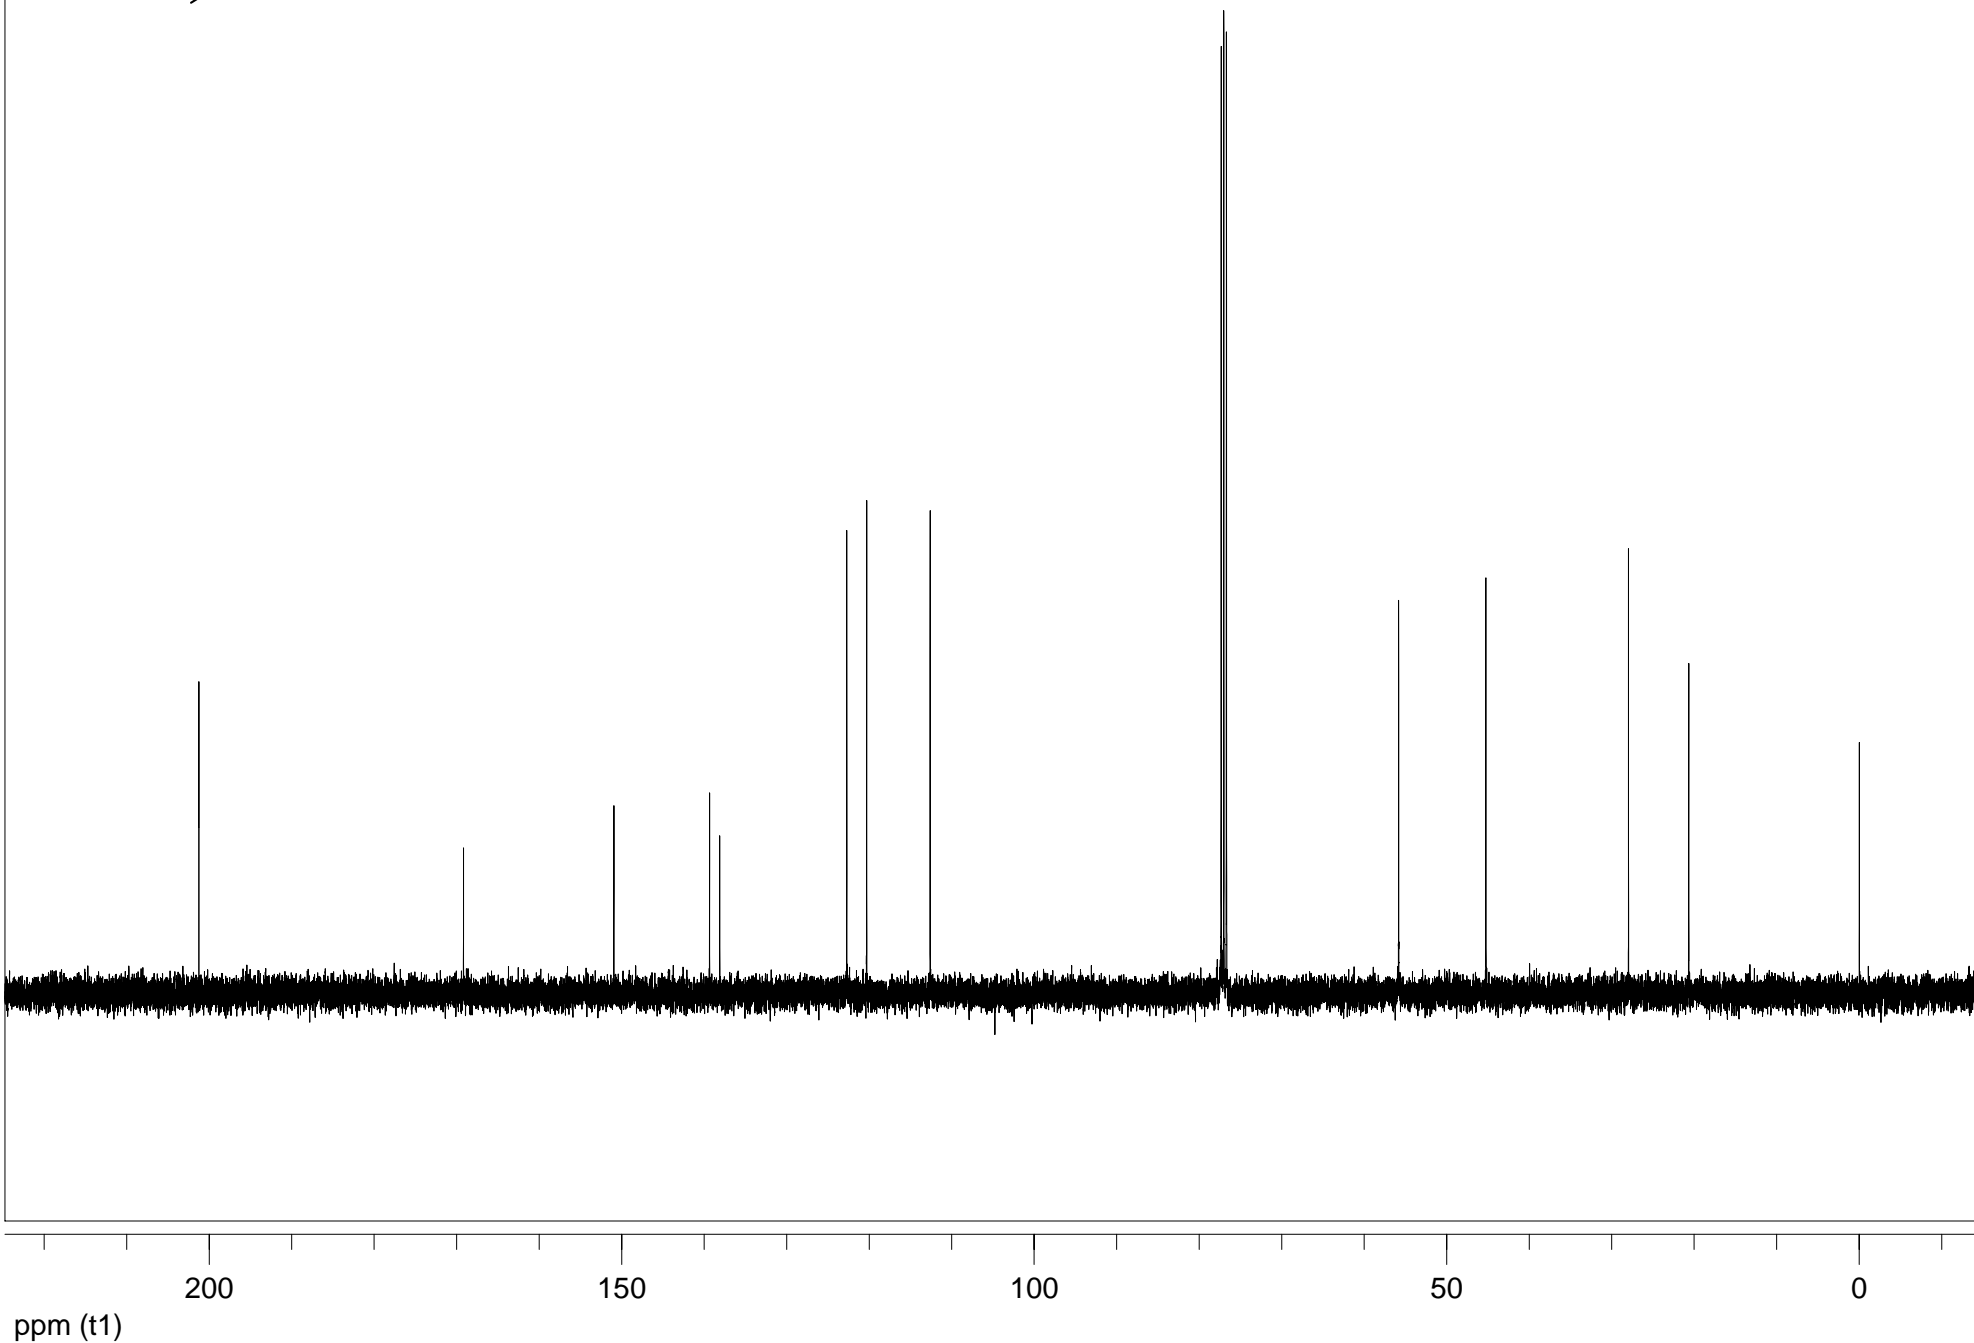

Supplement: b713273e.pdf [file b713273e.pdf]
